1 ***S. cerevisiae* cells can grow without the Pds5 cohesin subunit**

2 Karan Choudhary<sup>1</sup>, Ziv Itzkovich<sup>1</sup>, Elisa Alonso-Perez<sup>1,2</sup>, Hend Bishara<sup>1</sup>, Barbara  
3 Dunn<sup>3</sup>, Gavin Sherlock<sup>3</sup>, Martin Kupiec<sup>1,5</sup>

4

5

6

7

8

9

10

11

12

13

14 1: The Shmunis School of Biomedicine and Cancer Research, Tel Aviv  
15 University, Ramat Aviv 69978, Israel.

16 2: Current address: Centro de Biología Molecular Severo Ochoa, CSIC-UAM  
17 28049 Madrid, Spain

18 3: Departments of Genetics, Stanford University, Stanford, CA, USA.

19 5: Corresponding author. [martin@tauex.tau.ac.il](mailto:martin@tauex.tau.ac.il)

20 **KEYWORDS:** DNA replication, Sister Chromatid Cohesion, Cohesin, ELG1,  
21 PCNA and PDS5.

22 **ABSTRACT:**

23 During DNA replication, the newly created sister chromatids are held together  
24 until their separation at anaphase. The cohesin complex is in charge of creating  
25 and maintaining sister-chromatid cohesion (SCC) in all eukaryotes. In *S.*  
26 *cerevisiae* cells, cohesin is composed of two elongated proteins, Smc1 and  
27 Smc3, bridged by the kleisin Mcd1/Scc1. The latter also acts as a scaffold for  
28 three additional proteins, Scc3/Irr1, Wpl1/Rad61, and Pds5. Although the HEAT-  
29 repeat protein Pds5 is essential for cohesion, its precise function is still debated.  
30 Deletion of the *ELG1* gene, encoding a PCNA unloader, can partially suppress  
31 the temperature-sensitive *pds5-1* allele, but not a complete deletion of *PDS5*. We  
32 carried out a genetic screen for high copy number suppressors and another for  
33 spontaneously arising mutants, allowing the survival of a *pds5Δ elg1Δ* strain. Our  
34 results show that cells remain viable in the absence of Pds5 provided that there  
35 is both an elevation in the level of Mcd1 (which can be due to mutations in the  
36 *CLN2* gene, encoding a G1 cyclin), and an increase in the level of SUMO-  
37 modified PCNA on chromatin (caused by lack of PCNA unloading in *elg1Δ*  
38 mutants). The elevated SUMO-PCNA levels increase the recruitment of the Srs2  
39 helicase, which evicts Rad51 molecules from the moving fork, creating ssDNA  
40 regions that serve as sites for increased cohesin loading and SCC establishment.  
41 Thus, our results delineate a double role for Pds5 in protecting the cohesin ring  
42 and interacting with the DNA replication machinery.

43 **IMPORTANCE:**

44 Sister chromatid cohesion is vital for faithful chromosome segregation,  
45 chromosome folding into loops, and gene expression. A multisubunit protein  
46 complex known as cohesin holds the sister chromatids from S-phase until the  
47 anaphase stage. In this study, we explore the function of the essential cohesin  
48 subunit Pds5 in the regulation of sister chromatid cohesion. We performed two  
49 independent genetic screens to bypass the function of the Pds5 protein. We  
50 observe that Pds5 protein is a cohesin stabilizer, and elevating the levels of  
51 Mcd1 protein along with SUMO-PCNA accumulation on chromatin can

52 compensate for the loss of the *PDS5* gene. In addition, Pds5 plays a role in  
53 coordinating the DNA replication and sister chromatid cohesion establishment.  
54 This work elucidates the function of cohesin subunit Pds5, the G1 cyclin Cln2,  
55 and replication factors PCNA, Elg1 and Srs2 in the proper regulation of sister  
56 chromatid cohesion.

57

## 58 **INTRODUCTION:**

59 Cohesin is a conserved protein complex that has two remarkable activities: i) it  
60 can tether two regions of chromatin (within the same DNA molecule or between  
61 DNA molecules) (1) and ii) it can extrude loops of chromatin (2, 3). These  
62 activities mediate sister chromatid cohesion (a mechanism that holds together  
63 the newly replicated DNA molecules from S-phase until anaphase) and facilitate  
64 condensation, DNA repair, and transcription regulation of a subset of genes (4).  
65 The temporal and spatial regulation of these cohesin-dependent biological  
66 processes is achieved in part by the complex regulation of cohesin. Identifying  
67 the modes of cohesin regulation and their coordination remains an important but  
68 elusive goal of the field.

69 In all eukaryotic organisms, including *S. cerevisiae*, the cohesin complex consists  
70 of four core subunits: two Structural Maintenance of Chromosome (SMC)  
71 proteins, Smc1 and Smc3, one kleisin protein, Mcd1/Scc1 (hereafter referred as  
72 Mcd1) along with the HAWK family protein (HEAT proteins associated with  
73 kleisin) Scc3 [reviewed by (5)]. Various essential and non-essential proteins  
74 regulate cohesin life cycle. Here we focus on elucidating the function of Pds5,  
75 one of cohesin's most critical and complex regulators. Pds5 is a HEAT repeat  
76 protein with no apparent catalytic activity that binds to Mcd1 near its N-terminus  
77 and plays central roles in cohesin function (6–8). Pds5 is important for human  
78 health as Pds5p deficiency has been linked to many cancers (9).

79 Pds5 was initially identified as a factor required for the maintenance of cohesion  
80 from S phase until the onset of anaphase (6, 10). The Pds5 protein is conserved

81 and essential for cell division in almost all eukaryotes (4). However, subsequent  
82 studies have shown that Pds5 seems to regulate cohesion both negatively and  
83 positively. It is required for cohesion establishment and maintenance (6, 11). It  
84 also forms, with the Wpl1 protein, a complex that counteracts cohesion (12). How  
85 Pds5 plays such diverse and sometimes opposing roles in cohesin function?  
86 Several mechanistic studies have provided important clues.

87 SCC is a cell cycle-regulated phenomenon, and co-entrapment of sister DNA  
88 (establishment) is dependent on DNA replication. In *S. cerevisiae*, cohesin  
89 binding to chromatin starts in late G1; however, the cohesin rings are converted  
90 into cohesive structures only during DNA replication (13). The conserved acetyl-  
91 transferase Eco1 is essential for replication-dependent cohesion establishment  
92 (14, 15). Eco1 moves with the replication fork and acetylates the Smc3 protein at  
93 conserved lysine residues (K112, K113 in yeast) located in the head domain of  
94 Smc3 (16). Pds5 binding to cohesin enhances its acetylation by the Eco1 acetyl-  
95 transferase (11). Also, Pds5 is known to block cohesin's ATPase activity(17, 18)  
96 and antagonize the cohesin removal from the chromosomes by Wpl1 (11).  
97 However, other results contradict this Wpl1-centered view of the role of Smc3  
98 acetylation and suggest that Pds5 binding to cohesin promotes SCC by a  
99 second, yet to be defined step (19).

100 In addition, Pds5 maintains cohesion, at least in part, by antagonizing the  
101 polySUMO-dependent degradation of cohesin (20, 21) and thereby stabilizing the  
102 complex. Pds5 binding to cohesin also promotes removal of unacetylated  
103 cohesin from chromosomes because Pds5 is a scaffold for Wpl1's interaction  
104 with cohesin (12). However, many aspects of Pds5's regulation of cohesin remain  
105 to be elucidated. The importance of Pds5 in blocking cohesin poly-SUMOylation  
106 was demonstrated by identifying mutations in SUMO and SUMO-modifying  
107 enzymes that suppress the inviability of Pds5 deficiency. However, other  
108 phenotypes of Pds5 deficiency were not suppressed (20–22) indicating that  
109 regulating the SUMO status of cohesin is only one function of Pds5.

110 PCNA, which recruits Eco1 to carry out its function, is a homotrimeric ring that  
111 plays a central role in DNA replication and repair. It acts as a processivity factor  
112 for the replicative DNA polymerases and as a "landing platform" on the moving  
113 replication fork. A conserved RFC-like complex that includes the Elg1 protein is  
114 in charge of PCNA unloading during Okazaki fragment processing and ligation  
115 [reviewed in (13, 23)]. Deletion of *ELG1* is not lethal but leads to increased  
116 recombination levels, as well as elevated levels of chromosome loss and gross  
117 chromosomal rearrangements (24). Human ELG1/ATAD5 plays an essential role  
118 in maintaining genome stability and acts as a tumor-suppressor gene (25). In the  
119 absence of the *ELG1* gene, PCNA accumulates on the chromatin, mainly in its  
120 SUMOylated form (26, 27). Mutants lacking Elg1 exhibit defects in SCC and are  
121 synthetic lethal with hypomorphic alleles of cohesin subunits (28). Thus, it is  
122 surprising that deletion of *ELG1* can suppress the temperature sensitivity (TS) of  
123 the *pds5-1* allele (29).

124 In this article we investigate the mechanisms by which cells can survive in the  
125 complete absence of Pds5. By carrying out genetic screens for suppressors of  
126 *pds5Δ elg1Δ* double mutants, we identify novel features Pds5 that inform on its  
127 integration with other cohesin regulators.

128

## 129 **RESULTS:**

### 130 **Screening for suppressors of the *pds5Δ elg1Δ* double mutant.**

131 Pds5 is essential for cohesion and cell viability in yeast (10, 30) and mammals  
132 (31). Thus, most studies in yeast take advantage of the *pds5-1* mutant, which  
133 can grow at the permissive temperature of 25°C, but does not grow at  
134 temperatures higher than 34°C (20, 29, 30). Previous studies revealed that a  
135 deletion of the *ELG1* PCNA unloader suppresses the temperature sensitivity of  
136 *pds5-1* mutant cells, allowing them to grow at higher temperatures (29). We  
137 confirmed this result (data not shown) and tried to test whether the lack of Elg1  
138 could also suppress a total deletion of *PDS5*. We created a *pds5Δ elg1Δ* double

139 mutant strain kept alive by the presence of a *URA3*-marked centromeric plasmid  
140 carrying the *PDS5* gene. This strain, however, was unable to form colonies on 5-  
141 FOA (5-Fluoroorotic acid) plates, which select for Ura<sup>-</sup> cells that have lost the  
142 covering plasmid (**Figure S1A**). We thus conclude that whereas the deletion of  
143 *ELG1* can suppress the *pds5-1* temperature-sensitive allele, which may still carry  
144 some residual Pds5 protein at high temperature, it cannot rescue the complete  
145 lack of Pds5 protein.

146 To better understand the interactions between Pds5 and Elg1, we  
147 performed two independent genetic screens looking for the suppressors of the  
148 *pds5Δ elg1Δ* double mutant. We looked for high-copy-number suppressors on  
149 the first screen, whereas in the second screen, we searched for spontaneous  
150 mutations in the genome that allowed the *pds5Δ elg1Δ* strain to survive without  
151 the covering plasmid.

152 **Pds5 ensures cell viability by enhancing the amount of Mcd1 in cohesin**  
153 **complexes.**

154 In our high copy number suppressor screen, we transformed a *pds5Δ elg1Δ*  
155 strain kept alive by the presence of a covering *URA3-PDS5-TRP1* plasmid with a  
156 yeast genomic library overexpressed from a 2-micron plasmid marked with a  
157 *LEU2* marker [the Yeast Genomic Tiling Collection (32) (**Figure 1A**)]. We  
158 searched for colonies able to grow in the absence of the covering plasmid. Since  
159 5-FOA resistant colonies could also arise from mutations in the *URA3* gene  
160 carried on the plasmid, we identified Leu<sup>+</sup>, 5-FOA<sup>r</sup> (Ura<sup>-</sup>), Trp<sup>-</sup> colonies, and  
161 isolated their library *LEU2*-marked plasmid (**Figure 1A**).

162 Out of the 80 Leu<sup>+</sup> Ura<sup>-</sup> Trp<sup>-</sup> colonies obtained, 53 plasmids carried the genomic  
163 fragment carrying the *PDS5* gene, confirming the validity of our approach.  
164 Twenty-one additional plasmids carried a DNA fragment containing the *MCD1*  
165 gene. Mcd1 is one of the four core subunits of the cohesin complex. We further  
166 confirmed these results by transforming the cells with a subclone carrying only

167 the *MCD1* gene. **Figure 1B** shows that overexpression of *MCD1* suppressed the  
168 lethality of *pds5Δ* in the absence of *ELG1*, but not in its presence.

169 To further understand the mechanism of this suppression, we selected  
170 different mutants of Mcd1 and observed their potential to rescue the lethality of  
171 *pds5Δ* and *pds5Δ elg1Δ* cells. We hypothesized that deletion of *ELG1* may elicit  
172 the DNA damage dependent, Chk1-dependent cohesion establishment pathway,  
173 which requires acetylation of Mcd1 at lysines 84 and 210 (33). If this proposition  
174 was true, then overexpression of the *mcd1-RR* allele (no acetylation possible)  
175 should not suppress, whereas overexpression of the *mcd1-QQ* (mimicking  
176 constant acetylation) should suppress the *pds5Δ elg1Δ* cells. However, both  
177 alleles were equally able to rescue the lethality of *pds5Δ elg1Δ*, suggesting that  
178 the rescue is independent of the DNA damage-mediated pathway (**Figure 1C**).  
179 Furthermore, the deletion of the *CHK1* gene did not affect the suppression  
180 provided by Mcd1 overexpression (data not shown).

181 Overexpression of Mcd1 could be titrating an interacting protein; alternatively, it  
182 might be required to increase the levels of active cohesin. We thus introduced  
183 *MCD1* alleles unable to interact with cohesin (*mcd1-F528R* and *mcd1-L532R*)  
184 (34) or, as a control, an allele that does not interact with Pds5 (*mcd1-V137K*)(35).  
185 **Figure 1D** shows that only overexpression of the *mcd1* alleles that could be  
186 incorporated into the cohesin complex allowed the *pds5Δ elg1Δ* double mutant to  
187 grow on 5-FOA plates, ruling out a titration effect. The overproduction of different  
188 Mcd1 alleles was also confirmed by western blot in *pds5Δ* and *pds5Δ elg1Δ*  
189 double mutant background (**Figure S1B**). Thus, increased levels of Mcd1 at  
190 chromatin allow *pds5Δ elg1Δ* to grow. The fact that overexpression of Mcd1  
191 cannot suppress the single *pds5Δ* mutant but efficiently suppresses the double  
192 *pds5Δ elg1Δ* suggests that in the absence of Pds5, two independent changes  
193 are necessary: on the one hand an elevation of Mcd1 levels, on the other hand,  
194 something that the absence of *ELG1* is providing. Each of these two changes is  
195 by itself insufficient to allow *pds5Δ* strains to grow.

196 **Spontaneous mutations in the G1 cyclin *CLN2* ensure cell viability of *pds5Δ***  
197 ***elg1Δ* double mutant.**

198 In our second screen, we looked for spontaneous mutants that allow the *pds5Δ*  
199 *elg1Δ* double mutant strain to lose its covering plasmid. We plated a large  
200 number of yeast cells on 5-FOA plates in several batches and looked for colonies  
201 that grew on 5-FOA plates and were Leu-. We confirmed that these colonies had  
202 lost the covering plasmid and performed whole genome sequencing to identify  
203 the suppressor mutations in the genome (**Figure 1E**).

204 Out of the 40 independent 5-FOA resistant, Leu- mutants that lost their covering  
205 plasmid, 23 carried *de novo* mutations in the *CLN2* gene. Most of the mutations  
206 were nonsense, frameshift, or indel mutations that inactivated the gene (**Figure**  
207 **S1C**). The *CLN2* gene encodes a G1 cyclin that is necessary for the transition  
208 between G1 and S phases. In order to test these results, we made a genomic  
209 deletion of *CLN2* gene in the *pds5Δ elg1Δ* background. As expected, the strain  
210 carrying the triple deletion of *pds5Δ elg1Δ cln2Δ* grew well on 5-FOA plates,  
211 suggesting that the *CLN2* deletion suppresses the lethality of the *pds5Δ elg1Δ*  
212 strain (**Figure 1F**). A second G1/S cyclin gene, *CLN1*, has 57% sequence  
213 identity (72% in the N-terminal region) to *CLN2* gene (36) and is expressed with  
214 similar timing, attaining maximal expression during the G1/S transition (37).  
215 Therefore, both *CLN1* and *CLN2* genes are considered functionally redundant  
216 (38). **Figure 1F**, however, shows that a deletion of *CLN1* could not suppress the  
217 lethality of the *pds5Δ elg1Δ* double mutant strain. As in the case of *MCD1*  
218 overexpression, the deletion of *CLN2* only allows growth of the *pds5Δ* strain if  
219 *ELG1* is deleted too, confirming the existence of two different pathways that need  
220 to be modified to allow life in the absence of Pds5.

221 **Pds5 counteracts mechanisms that limit Mcd1 levels in cells.**

222 Based on the results from our genetic screens, our working hypothesis was that  
223 the deletion of *CLN2* mimics the overexpression of *MCD1*, increasing its protein  
224 level. In the following experiments, we used an auxin-inducible degron (AID) in  
225 order to be able to degrade Pds5 conditionally. The AID-*PDS5* strain grew



226 normally and showed no cohesion or cell cycle defects. Adding auxin to the  
227 medium leads to the rapid degradation of Pds5 (**Figure S2A, B**). We arrested the  
228 cells in the cell cycle at the M phase with nocodazole and treated them with auxin  
229 for 2 hours. As expected from previous studies (20), there is a significant  
230 decrease in the level of Mcd1 protein in the *AID-PDS5* strain compared with the  
231 untagged strain in the presence of Auxin (WT vs. *AID-PDS5*, p value=0.02)  
232 (**Figure 2A and B, S2C**). *AID-PDS5 elg1Δ* and *AID-PDS5 cln2Δ* strains treated  
233 with auxin showed a similar decrease of Mcd1 protein (WT vs. *AID-PDS5 elg1Δ*  
234 p value=0.01; WT vs. *AID-PDS5 cln2Δ* p value=0.02). Mcd1 levels, however,  
235 were improved in the *AID-PDS5 elg1Δcln2Δ* strain in the presence of Auxin (*AID-*  
236 *PDS5* vs. *AID-PDS5 elg1Δcln2Δ* p value=0.005) (**Figure 2A and B**). To follow  
237 the kinetics of Mcd1 protein in the absence of Pds5, we induced the degradation  
238 of Pds5 by adding auxin to mid-log cultures and then measured the level of Mcd1  
239 every 20 minutes. Following Pds5 degradation, the Mcd1 protein levels  
240 significantly drop in the *AID-PDS5* strain and in the single *elg1Δ* and *cln2Δ*  
241 mutants. In contrast, we observed a much slower kinetic of Mcd1 reduction in the  
242 *AID-PDS5 elg1Δ cln2Δ* mutant, which retained more than half of the Mcd1  
243 protein levels after two hours of auxin addition (**Figure 2C-F**). We conclude that  
244 only the concomitant deletion of *ELG1* and *CLN2* can restore enough Mcd1 to  
245 allow cell growth without Pds5.

#### 246 ***CLN2* deletion leads to overexpression of the Mcd1 gene.**

247 The high level of Mcd1 could be due to increased gene expression or to protein  
248 stabilization. To test whether the deletion of both *ELG1* and *CLN2* prevented  
249 Mcd1 degradation, we measured the half-life of Mcd1 in the presence of  
250 cycloheximide (CHX), which inhibits global protein synthesis. No significant  
251 difference in the rate of degradation was found between *AID-PDS5* and *AID-*  
252 *PDS5 elg1Δ cln2Δ* strains in the presence or absence of auxin (**Figure S3A-F**).  
253 Therefore, the increased levels of Mcd1 in the *AID-PDS5 elg1Δ cln2Δ* strain are  
254 not due to the increased stability of the Mcd1 protein. We thus hypothesized that  
255 the higher Mcd1 levels would be a consequence of increased Mcd1 transcription.

256 To test this hypothesis, we constructed a plasmid vector carrying short-lived GFP  
257 under the control of the *MCD1* promoter and a mCherry gene under the control of  
258 a constitutive *ADH1* promoter, which serves as an internal plasmid copy number  
259 control (**Figure 3A**). We introduced this plasmid into the different AID-PDS5  
260 strains and, using a flow cytometer, we measured the mean fluorescence  
261 intensity (MFI) for GFP and mCherry. We observe that the GFP/mCherry MFI  
262 ratio is significantly higher in AID-PDS5 *elg1Δ cln2Δ* and AID-PDS5 *cln2Δ* strains  
263 compared to AID-PDS5 in the absence or presence of Auxin (**Figure 3B**). To  
264 validate the results from flow cytometry, we did a western blot analysis to  
265 observe the GFP protein levels in different strains carrying the reporter plasmid.  
266 In agreement with the earlier experiment, we observe a significant increase in the  
267 GFP protein levels in the AID-PDS5 *elg1Δ cln2Δ* and AID-PDS5 *cln2Δ* strains  
268 (**Figure 3C, D**)

269 Next, we wanted to understand how deletion of *CLN2* results in hyper-  
270 transcription of the *MCD1* gene. Cln2 is a G1 cyclin that promotes MBF-  
271 dependent transcription of many DNA replication and repair-associated genes  
272 during the G1-S phase transition (39). These genes contain distinct DNA binding  
273 domains for the MBF complex in their promoter (MCB motifs). The *MCD1*  
274 promoter contains two putative MCB motifs. Simultaneous deletion of both MCB  
275 motifs from the *MCD1* promoter completely abolished the GFP expression of all  
276 strains (**Figure 3E, F**). These results show that the increased transcription of  
277 *MCD1* observed in *cln2Δ* cells is dependent on the MBF complex. Thus, the  
278 deletion of *CLN2* hyper-activates the MBF complex. Our results are consistent  
279 with previous studies, which also observed a high transcription of the MBF  
280 regulon in *cln1Δ cln2Δ* strain background (40, 41).

### 281 **Simultaneous deletion of *CLN2* and *ELG1* restores SCC to cells lacking** 282 **Pds5**

283 In the absence of Pds5, yeast cells die due to SCC defects. These cells are  
284 defective both in the establishment and maintenance of cohesion (30, 42).

285 Similarly, *elg1Δ* strains were shown to be slightly defective SCC and exhibit  
286 increased levels of premature sister chromatid separation (28), although it was  
287 unclear whether the defect resides in the establishment or the maintenance of  
288 the cohesion. The simultaneous deletion of *ELG1* and *CLN2* provides robust  
289 growth in the absence of Pds5. To test whether SCC was also restored, we used  
290 the two-dot GFP assay (43). In this assay, an array of Lac operators is inserted in  
291 the chromosomal arms, recognized by a Lac repressor-GFP fusion protein. The  
292 binding of LacI-GFP to chromosomal arms can be observed under the  
293 fluorescent microscope as a bright dot in living yeast cells. When sister  
294 chromatids are adequately aligned by cohesion, only a single dot is seen,  
295 whereas two dots are observed in cells exhibiting premature separation (43).

296 We carried out a cohesion assay by synchronizing the cells in G1 with alpha-  
297 factor, then releasing the cells into the cell cycle in the presence of auxin and  
298 nocodazole (**Figure 4A, B**). This assay mainly measures the cells' ability to  
299 establish functional cohesin molecules at the beginning of the S-phase. Under  
300 these conditions, the *AID-PDS5* strain exhibited more than 40% of cells with  
301 double dots, consistent with previous reports (20, 42). Deletion of *ELG1* or *CLN2*  
302 reduced the number of cells with premature sister chromatid separation, and the  
303 number was significantly further reduced in the *AID-PDS5 elg1Δ cln2Δ* strain (p  
304 value=0.021), indicative of an additive effect of the *elg1Δ* and *cln2Δ* mutations.  
305 As expected, no precocious chromatid separation was detected when auxin was  
306 omitted from the assay.

307 SCC is established during DNA replication in S-phase and maintained until  
308 anaphase. To test for SCC maintenance, cells were synchronized in early mitosis  
309 with nocodazole (after establishing cohesion) and maintained for 2 hours in the  
310 presence of auxin and nocodazole (**Figure 4C, D**). The *AID-PDS5* strain  
311 exhibited a substantial maintenance defect: close to 60% of the cells exhibited  
312 two dots, consistent with previous reports (22). In this assay, the deletion of  
313 *ELG1* had only a minor effect, reducing the number of two-dot cells to ~40%. In  
314 contrast, the *AID-PDS5 cln2Δ* strain strongly reduced the number of cells with

315 two dots, not significantly changed in the AID-*PDS5 elg1Δ cln2Δ* strain (T-test p-  
316 value = 0.022).

317 Our results thus point at two different roles of the *CLN2* and *ELG1* in sister  
318 chromatid cohesion: whereas both of them affect the establishment by separate  
319 pathways (and thus the mutants show additivity), the *elg1Δ* mutant plays only a  
320 small role once the sister chromatid cohesion has been established, whereas  
321 *cln2Δ* affects maintenance too. Both mutations are required for full viability  
322 (**Figure 1**).

323 **Elg1 contributes to the suppression by accumulating more PCNA on**  
324 **chromatin.**

325 The absence of Elg1 causes an accumulation of PCNA on the chromatin (44,  
326 45). This increased level of PCNA is held responsible for most genome instability  
327 phenotypes exhibited by *elg1Δ* (46). To understand the function of Elg1 in SCC,  
328 we compared *pds5Δ cln2Δ* strains carrying a *URA3-PDS5*-covering plasmids,  
329 bearing different *ELG1* alleles in their genomes. The ability of the different alleles  
330 to provide Elg1 function was assayed by plating on 5-FOA plates (**Figure 5**).  
331 Whereas cells carrying an empty vector can lose their covering plasmid and grow  
332 on 5-FOA plates, the presence of the WT *ELG1* gene prevents growth,  
333 confirming our previous observations (**Figure 5A**). We observe that mutations in  
334 the *ELG1* Walker A motif, alleles with reduced ability to unload and recycle  
335 PCNA, such as *elg1-TT386,7DD*, *elg1-sim+TT386,387DD* (46), the Walker B  
336 mutant *elg1-DVD to KVK*, and the Walker A/Walker B double mutants (47) were  
337 unable to complement the *ELG1* deletion, and grew on 5-FOA plates. In contrast,  
338 mutations that do not greatly affect PCNA unloading, such as the *elg1-*  
339 *KK343,344AA* allele, fully complemented the Elg1 defect and thus were unable to  
340 allow growth on 5-FOA plates. A good correlation was observed between the  
341 degree of sensitivity to methyl methanesulfonate (MMS) [which reflects the  
342 amount of PCNA on the chromatin (46)] and the ability to lose the covering  
343 plasmid (**Figure 5A**). Moreover, PCNA variants that spontaneously disassemble

344 from the chromatin (such as *pol30-D150E*, *E143K* or *S152P* (48), suppress the  
345 sensitivity of *pds5Δ elg1Δ cln2Δ* strains to MMS and prevent growth on 5-FOA  
346 (**Figure 5B**), indicating that the effect conferred by the deletion of *ELG1* is due to  
347 the increased levels of PCNA on chromatin. PCNA acts as a binding platform for  
348 the cohesin acetyltransferase Eco1 (16). Therefore, a simple hypothesis to  
349 explain the increased SCC in *elg1Δ* strains is that high levels of PCNA  
350 accumulation on chromatin caused by the *ELG1* deletion might elevate the  
351 chromatin levels of Eco1 protein. To test this possibility, we monitored Eco1's  
352 overall chromatin abundance. We observe that although *elg1Δ* has higher levels  
353 of PCNA on chromatin, a corresponding increase in Eco1 abundance is not  
354 observed (**Figure 5C, D**).

355 **Suppression of Pds5 depletion suggests that cohesin function is limited by**  
356 **Elg1-dependent removal of SUMOylated PCNA from DNA.**

357 The post-translational modifications of PCNA play an essential role in genome  
358 stability by coordinating several replication-coupled DNA damage tolerance  
359 pathways. When a replisome encounters a DNA lesion on a template strand, it  
360 may undergo modifications to activate a specific DNA damage bypass pathway  
361 [reviewed in (23)]. The Rad6/Rad18 dependent PCNA mono-ubiquitination at the  
362 K164 residue results in recruitment of an error-prone TLS (translesion synthesis  
363 polymerase) which adds more or less random bases at the damage site, allowing  
364 its bypass. The Rad5-dependent poly-ubiquitination at the K164 residue  
365 promotes an error-free template switch pathway (49). Similarly, PCNA  
366 SUMOylation at K127 and K164 by the SUMO ligase Siz1 recruits the helicase  
367 Srs2, which acts as a local anti-recombination factor (50).

368 In order to test whether PCNA modification plays any role in the suppression via  
369 *elg1Δ*, we mutated the conserved lysine residues K164 and K127 to the  
370 unmodifiable residue arginine in the background of *pds5Δ elg1Δ cln2Δ*.  
371 Interestingly, we find that PCNA mutations *pol30-K164R* or *pol30-KK127,164RR*  
372 both prevent plasmid loss and render cells inviable on FOA plates (**Figure 6A**).

373 These results suggest that *elg1Δ* contributes to suppression by accumulating  
374 modified PCNA on chromatin. Next, we asked which kind of PCNA modification  
375 (SUMOylation or ubiquitination) is essential for promoting cohesion via *elg1Δ*.  
376 Deleting *RAD18* or *RAD5* in the *pds5Δ elg1Δ cln2Δ* background renders these  
377 strains susceptible to DNA damaging agent MMS; however, the lack of these  
378 factors did not affect the growth of yeast cells on FOA plates. In contrast, the  
379 deletion of the SUMO ligase Siz1 in the *pds5Δ elg1Δ cln2Δ* background  
380 abolished the rescue, and cells could not grow on FOA plates (**Figure 6B**).  
381 Therefore, we conclude that *elg1Δ* promotes cohesion by accumulating  
382 SUMOylated PCNA on the chromatin.

### 383 **Suppression of Pds5 depletion suggests that cohesin function is limited by** 384 **Srs2-dependent removal of Rad51**

385 Srs2 is an helicase that inhibits homologous recombination by stripping Rad51  
386 filaments from the ssDNA (51). Srs2 binds to SUMOylated PCNA, and we have  
387 shown that *elg1Δ* strains accumulate a high level of both SUMOylated PCNA and  
388 Srs2 on chromatin (45). Based on this information, we deleted *SRS2* in *the*  
389 *pds5Δ elg1Δ cln2Δ* background and found that indeed *pds5Δ elg1Δ cln2Δ srs2Δ*  
390 strains are unable to lose the covering *PDS5* plasmid and are inviable on FOA  
391 plates.

392 Moreover, we could rescue this quadruple mutant by deleting the *RAD51* gene,  
393 encoding an ssDNA binding protein involved in homologous recombination, and  
394 substrate of Srs2 (**Figure 6C**). Therefore, in summary, we have found that *elg1Δ*  
395 promotes cohesion in the absence of Pds5 by accumulating SUMOylated PCNA  
396 on chromatin, thus promoting Srs2 activity to remove Rad51 filaments from  
397 ssDNA. We propose that by removing the Rad51 nucleoprotein, Srs2 generates  
398 ssDNA, which allows the deposition of cohesin molecules to establish sister  
399 chromatid cohesion when Pds5 is not present.

### 400 **DISCUSSION:**

401 Sister chromatid cohesion plays a fundamental role in cell division by ensuring  
402 faithful chromosome segregation. The establishment of sister chromatid cohesion  
403 is intimately linked to DNA replication, and many *bona fide* replication factors  
404 have been shown to be essential for cohesion establishment (13, 52, 53). In this  
405 study, we aimed to explore the genetic interactions between the PCNA unloader  
406 Elg1 and the cohesin accessory subunit Pds5. Although previous work showed  
407 that the deletion of *ELG1* could allow a temperature-sensitive *pds5-1* strain to  
408 grow at higher temperatures (22), the mechanistic details of this genetic  
409 interaction were not well understood.

410 Our genetic screens show that cells can retain SCC and viability in the absence  
411 of Pds5, if the essential functions provided by this protein are supplied by two  
412 alternative routes. We show that Pds5 protein is critical to protect cohesin  
413 function that is limited by Cln2-dependent inhibition of the *MCD1* transcription at  
414 the G1/S transition. We also show that the loss of cohesion caused by Pds5  
415 deficiency can be partially suppressed by ectopic overexpression of *MCD1* or by  
416 deletion of *CLN2* (**Figure 1**). Our results indicate that *cln2Δ* enhances cohesin  
417 function by promoting MBF activity, and thus *MCD1* cell cycle-dependent  
418 transcription at the G1/S transition. Thus the set point for cellular cohesin  
419 function is below its potential capacity because of limiting *MCD1* transcription  
420 early in the cell cycle. The notion that Mcd1 transcription limits cohesin function  
421 to suboptimal levels has precedent in recent studies of Ewing Sarcoma  
422 (54). These studies demonstrated that EWS-FLS1 fusion, a key determinant of  
423 this cancer, causes replicative stress and cellular senescence. The acquisition of  
424 an extra copy of the RAD21 (human ortholog of MCD1) dampens this stress and  
425 increases cell proliferation. Thus, also in these cells the level of Rad21  
426 expression is suboptimal for addressing replicative stress (54). The existence of  
427 a suboptimal set point for MCD1 transcription for cohesion and DNA repair infers  
428 that optimal levels may have counteracting deleterious effects, for example  
429 inhibiting chromosome segregation or cohesin-independent pathways of DNA  
430 repair. Indeed, artificially limiting the Mcd1 levels by quantized reductions (QR)  
431 approach affect the Chromosome condensation, repetitive DNA stability, and

432 DNA repair in yeast (55). While previous studies have not revealed phenotypes  
433 for cells overexpressing MCD1, our study suggests that a more comprehensive  
434 characterization of chromosome segregation, DNA repair and transcription in  
435 these cells is warranted.

436 Thus, our work helps delineate the molecular roles played by the Pds5 cohesin  
437 accessory factor.

### 438 ***Pds5 is a cohesin stabilizer during S-phase***

439 Cells lacking Pds5 protein exhibit high levels of premature separation of sister  
440 chromatids, which eventually jeopardize the chromosomal segregation program  
441 and result in cell death (**Figure 3**); (20, 30, 35). Previous work showed that  
442 deletion of the SUMO E3 ligase Siz2 can rescue the temperature sensitivity and  
443 cohesion defects of the *pds5-1* temperature-sensitive strain by protecting the  
444 cohesin subunit Mcd1 from SUMO-dependent degradation (20). These results  
445 imply that Pds5 exerts a protective effect, and in its absence, Mcd1 is degraded,  
446 leading to the disintegration of cohesin complexes and to premature sister  
447 separation. However, overexpression of Mcd1 from high-copy number plasmids  
448 or by deleting the G1 cyclin *CLN2* was not sufficient to restore viability to cells  
449 completely lacking the Pds5 protein (**Figure 1**). These results suggest that Pds5  
450 plays several different roles in SCC. Our unbiased genetic screens help delineate  
451 them.

452 By using a degron allele of *PDS5*, we demonstrate that indeed, Mcd1 is quickly  
453 degraded following the auxin-induced degradation of Pds5, resulting in cell  
454 death. In contrast, we find that in the background of *elg1Δ cln2Δ*, Mcd1 protein  
455 no longer follows the sharp degradation kinetics associated with auxin-induced  
456 Pds5 degradation (**Figure 2**). Thus, decoupling the dependence of Mcd1 protein  
457 on Pds5 for its stability renders the *pds5Δ elg1Δ cln2Δ* strain viable. Altogether,  
458 our results show that Pds5 provides essential protection to the cohesin complex.  
459 Recently it is observed, that conditional degradation of Pds5 adversely affect the  
460 loop extrusion activity of a cohesin complex (56). The loop extrusion function of  
461 Pds5 is linked to its cohesin stabilization activity (57, 58). The observation that



462 *pds5Δ elg1Δ cln2Δ* has sufficient cohesion (**Figure 3**) suggest that these cells  
463 stabilize cohesin complex in the absence of Pds5. In the future, it will be  
464 interesting to observe the cohesin's loop extrusion activity in *elg1Δ cln2Δ*  
465 background.

#### 466 ***The G1 cyclin CLN2 as a novel suppressor of Pds5***

467 In budding yeast, three G1 cyclins, *CLN1*, *CLN2*, and *CLN3*, are critical for  
468 starting the cell cycle and entry into subsequent cell cycle phases (59). These  
469 cyclins associate with the cell cycle-dependent kinase Cdc28 in a spatial and  
470 temporal manner to regulate the global gene expression. The Cln3 cyclin works  
471 upstream and is essential for the start of the cell cycle (60), where it activates the  
472 SBF and MBF transcription complexes. Cln1 and Cln2, on the other hand, are  
473 mainly involved in the G1/S transition and are believed to play functionally  
474 redundant roles (38) .

475 We show that deletion of *CLN2*, but not *CLN1*, provides viability to a *pds5Δ elg1Δ*  
476 strain (**Figure 1**). This result provides strong evidence that Cln1 and Cln2 are  
477 functionally distinct. The effect of *cln2Δ* is not due to increased stability of the  
478 Mcd1 protein, but rather to increased transcription of the *MCD1* gene by the MBF  
479 complex in the absence of *CLN2* (**Figure 4**). G1 cyclins Cln1 and Cln2 play a  
480 vital role in generating a phospho-degron on Sic1 protein, which is a potent S-  
481 phase inhibitor (61). The deletion of *CLN2* delays the entry into S-phase,  
482 prolonging the transcription period of *MCD1* and leading to an accumulation of its  
483 product. Thus, *cln2Δ*, similar to the high-copy number plasmid carrying the  
484 *MCD1* gene, rescues Pds5 deletion by providing an adequate amount of Mcd1 to  
485 compensate for its higher turnover in the absence of Pds5. These results  
486 establish an essential role of Pds5 in protecting Mcd1 at the G1/S boundary to  
487 insure proper SCC.

#### 488 ***ELG1 deletion promotes cohesion via SUMO-PCNA***

489 In the absence of *ELG1*, cells accumulate PCNA on chromatin, both unmodified  
490 and SUMOylated (45). In the two-dot assays, the deletion of *ELG1* showed its

491 effect mainly during SCC establishment and had only a minor effect during SCC  
492 maintenance (**Figure 3**). By using different *elg1* alleles, we show that the ability  
493 of the different alleles to confer viability to a *pds5Δ cln2Δ* strain is negatively  
494 correlated with their sensitivity to DNA damaging agents (**Figure 5A**), reflecting  
495 their ability to unload PCNA from chromatin (46). Moreover, mutations in PCNA  
496 that lead to their spontaneous disassembly from chromatin (48) completely  
497 abolished the suppressive effect produced by deleting *ELG1*. Taken together,  
498 these results show that the suppression of *pds5Δ cln2Δ* is due to higher PCNA  
499 levels on the chromatin in the absence of the Elg1 PCNA unloader. The Eco1  
500 acetyl-transferase binds PCNA, directly linking cohesion establishment to DNA  
501 replication (16). A simple model for the effect of deleting *ELG1* on the  
502 suppression of *pds5Δ* would therefore be through increased recruitment of the  
503 Eco1 acetyl-transferase. Unexpectedly, although high levels of PCNA on  
504 chromatin were observed in *elg1Δ*, the Eco1 levels on chromatin were not  
505 affected (**Figure 5C, D**), ruling out this simple explanation. However, despite the  
506 lack of increase in Eco1 protein abundance at the fork, the level of Eco1-  
507 dependent Smc3 acetylation is elevated in *elg1Δ* mutants (62).

#### 508 **SUMOylated PCNA recruits Srs2 to evict Rad51 from chromatin**

509 Srs2 is a DNA helicase that evicts Rad51 filaments from the ssDNA and  
510 performs pro and anti-recombination roles during DNA replication (63, 64). Srs2  
511 is recruited to chromatin by binding to SUMOylated PCNA (45), and has  
512 previously been shown to affect SCC (53). Our results show that Srs2 plays a  
513 central role in the pro-cohesion phenotype conferred by *elg1Δ*. Mutations that  
514 preclude SUMOylation of PCNA, or deletion of the *SRS2* gene itself, abolished  
515 the suppressive effect of *elg1Δ* and led to inviability of *pds5Δ elg1Δ cln2Δ* cells.  
516 Consistently with the known function of Srs2 function, the viability of a *pds5Δ*  
517 *elg1Δ cln2Δ srs2Δ* strain could be restored by deleting the *RAD51* gene,  
518 demonstrating that the role of *elg1Δ* is to recruit Srs2 in order to evict Rad51 from  
519 the chromatin (**Figure 6C**).

520 What could be the consequence of Rad51 eviction? One possible explanation is  
521 that eviction of Rad51 exposes ssDNA and this is interpreted as a local DNA  
522 damage signal which may induce Eco1 activity and cohesion. This could be in  
523 principle the role played by Pds5 during S-phase. Importantly, this proposed  
524 mechanism is different from the known Chk1-dependent pathway in which DNA  
525 damage induces cohesion through acetylation of Mcd1 at lysines 84 and 210 (51)  
526 **(Figure 1D)**. Similarly, a complete deletion of *CHK1* had no effect on the viability  
527 of a *pds5Δ elg1Δ cln2Δ* strain and did not prevent suppression of a *pds5Δ elg1Δ*  
528 strain by overexpression of Mcd1 (data not shown).

529 An alternative possibility is that Rad51 eviction allows the coupling between DNA  
530 replication and SCC establishment. Elegant biochemical assays by the  
531 Uhlmann's lab recently established that cohesin can be loaded onto dsDNA, but  
532 second-strand entrapment requires ssDNA (65). They therefore suggested a  
533 model in which cohesin is loaded onto the dsDNA present on the leading strand  
534 at the moving fork, followed by entrapment of ssDNA at the lagging strand, which  
535 is then stabilized by further DNA synthesis (65). Thus, a stretch of protein-free  
536 ssDNA becomes essential for cohesion establishment. The ssDNA gaps left by  
537 Rad51's eviction could thus allow more cohesion establishment in *elg1Δ*. Smc3  
538 acetylation is a hallmark of stably established cohesion, and Smc3 acetylation  
539 protein levels are used as a proxy to monitor the extent of cohesion  
540 establishment during DNA replication (14). Consistent with our model, *elg1Δ* has  
541 a higher level of Smc3 acetylation than the wild type (62), suggesting that the  
542 absence of Elg1 promotes increased cohesion establishment, provided that an  
543 ample enough amount of Mcd1 protein is available.

#### 544 ***A model for the roles of Pds5 and the suppression of pds5Δ by elg1Δ cln2Δ***

545 Our results delineate two essential roles for Pds5 in SCC: it protects the integrity  
546 of cohesin by preventing Mcd1 degradation, and it is involved in the activation of  
547 Smc3 acetylation by Eco1. These two roles take place during S-phase, and  
548 coordinate DNA replication with SCC.

549 Pds5 is necessary in order to protect the Mcd1 protein from SUMOylation and  
550 STUbL-dependent degradation (20, 21, 66). Deletion of both *CLN2* and *ELG1*, or  
551 overexpression of *MCD1* from a plasmid, contributes to increase Mcd1 levels.  
552 Whereas the first deletion increases MBF-dependent transcription of the *MCD1*  
553 gene (**Figure 4**), *ELG1* deletion may indirectly ensure higher levels of cohesive  
554 cohesin, in which, after Eco1 activity, Mcd1 may become resistant to  
555 degradation. However, the increase in the Mcd1 protein level is not sufficient to  
556 provide SCC in the absence of Pds5 (**Figure 7**). The second role for Pds5 occurs  
557 during DNA replication and involves the activation of Eco1 activity, required for  
558 stabilizing cohesin on the chromatin. This second activity can be supplied by a  
559 deletion of *ELG1*, provided enough Mcd1 is present. As we have shown,  
560 increased SUMO-PCNA on the chromatin allows increased cohesin loading and  
561 establishment by recruiting the Srs2 helicase to evict Rad51 (**Figure 6**). The  
562 increased SCC establishment explains the ability of *elg1Δ* to rescue the  
563 temperature sensitivity of both *pds5-1* and *eco1-1* strains (67)(22), and is  
564 consistent with higher Smc3 acetylation levels (62) of *elg1Δ* mutants. Just  
565 increasing the rate of establishment, however, is not enough, if the level of Mcd1  
566 is kept low due to its de-protection by the absence of Pds5. Only a combination  
567 of higher Mcd1 levels (provided by *cln2Δ* or by *MCD1* overexpression), together  
568 with the increased Rad51 eviction (indirectly caused by *ELG1* deletion) ensure a  
569 robust SCC in the total absence of Pds5 (**Figure 7**). In summary, our results thus  
570 provide novel insights on the function of the accessory cohesin subunit Pds5 in  
571 SCC.

572

## 573 **MATERIALS AND METHODS:**

### 574 **Yeast strains and media.**

575 All yeast strains used in this study are of A364A background. YPD medium was  
576 prepared with a ready-to-use mixture (FORMEDIUM). SC minimal was prepared  
577 with 2% dextrose (FORMEDIUM), Yeast Nitrogen Base w/o Amino Acids  
578 (DIFCO), and all necessary amino acids. 2% of agar (DIFCO) was added for  
579 solid media. Auxin (3-indole acetic acid; Sigma-Aldrich Catalogue # I3705) was  
580 added to SC minimal media with 300  $\mu$ M final concentration in DMSO. 5-FOA is  
581 SD with all amino acids and nucleobases, but only 50 mg of uracil and 0.8 g of 5-  
582 fluoroorotic acid (5-FOA) were used per liter of media.

### 583 **Cell cycle arrest.**

584 For experiments requiring cell cycle arrest, cells were grown at 30°C in SC  
585 complete medium until mid-log phase (0.6 OD<sub>600</sub>) and incubated with nocodazole  
586 (Sigma-Aldrich; Catalogue # M1404) (15  $\mu$ g/ml) for G2-M arrest or alpha-factor  
587 (Sigma-Aldrich; Catalogue # T6901) (50 ng/mL) for G1 arrest. Both incubation  
588 times were of two-hour duration. The text figures legends mention all cell cycle  
589 arrest experiment details.

### 590 **Yeast spot assays.**

591 Cells were grown to saturation in SC media at 30°C, diluted to 1 OD<sub>600</sub>, and then  
592 plated in 5-fold serial dilutions. Cells were incubated on plates at 30°C for 3-5  
593 days. 10  $\mu$ L from each appropriate dilution were then spotted on respective  
594 plates.

### 595 **Yeast genetic screen for the suppressors of *pds5Δ elg1Δ*.**

596 For the high copy number suppressor screen, the yeast cells were transformed  
597 with the entire Prelich collection, consisting of over 1500 plasmids containing a  
598 unique clone of a segment of the yeast *S. cerevisiae* genome. The cells were  
599 plated on 5-FOA plates to lose the Pds5 covering plasmid. The colonies that

600 grew on 5-FOA were confirmed for the loss of covering plasmid followed by  
601 Plasmids isolation and sequencing. The library was constructed by partially  
602 digesting prototrophic yeast genomic DNA with MboI and subcloning it into the  
603 BamHI sites of the *E. coli*-yeast shuttle vector, pGP564. The proteins are  
604 untagged and expressed from their endogenous wild-type promoter. The  
605 pGP564 shuttle vector contains the *LEU2* selectable marker and 2-micron  
606 plasmid sequences necessary to maintain a high copy number in yeast. The  
607 average insert size in this library is approximately 10 kb, with each insert  
608 containing an average of 4-5 genes. **B)** For the spontaneous suppressor screen,  
609 the cells carrying a double deletion of *PDS5* and *ELG1* and a *URA3-PDS5-LEU2*  
610 covering plasmid were plated on 5-FOA plates. Cells that grew on 5-FOA and  
611 were also Leu- (i.e., lost the covering plasmid) were subjected to whole-genome  
612 sequencing to find suppressor mutations in the genome.

### 613 **Whole-genome sequencing of yeast strains**

614 Sequencing libraries were constructed for each strain from whole-genome DNA,  
615 using a small-volume Nextera (Illumina.com) tagmentation protocol (68). Unique  
616 combinations of Nextera dual-index adapters were used for each sample, and all  
617 samples were multiplexed onto one Illumina HiSeq 2000 lane. Sequencing was  
618 performed at the Stanford Center for Genomics and Personalized Medicine using  
619 2x101bp paired-end read technology. Variant calling was carried out using CLC  
620 Genomics Workbench v8.5 (Qiagen.com). Sequences were uploaded to the NIH  
621 SRA under project number **PRJNA742489**.

### 622 **Cohesion analysis using the LacO-LacI system.**

623 We monitored the cohesion establishment and maintenance using the LacO-LacI  
624 system. Briefly, cells carrying tandem LacO repeats integrated at *LYS4*, located  
625 470 kb from *CEN4*, and a GFP-LacI fusion was used. For establishment  
626 experiments, cells were grown at 30°C in SC minimal medium until mid-log  
627 phase (0.6 OD<sub>600</sub>) and then incubated with alpha-factor (50 ng/mL) for G1 arrest  
628 for 2 hours. For depletion of AID-Pds5, Auxin was added (300 uM)

629 simultaneously. After this incubation, cells were washed three times in YPD  
630 (30°C) containing 0.1 mg/ml Pronase E (Sigma-Aldrich; Catalogue # P5147),  
631 resuspended in SC minimal medium containing nocodazole (15 µg/ml), and then  
632 incubated at 30°C for 2 h to early mitosis arrest while cohesion disjunction was  
633 analyzed every 20 min. For maintenance experiments, cells were grown at 30°C  
634 in SC minimal medium until mid-log phase (0.6 OD<sub>600</sub>) and then incubated with  
635 nocodazole (15 µg/ml) for 2 hours. After this incubation, auxin was added (300  
636 µM) for the depletion of AID-Pds5 proteins together with nocodazole (15 µg/ml)  
637 for 2 h at 30°C while cohesion disjunction was analyzed every 20 min. Images  
638 were acquired with an EVO FL microscope (ThermoFisher Scientific; Catalogue  
639 #AMF4300) equipped with the GFP Light Cube (470/22 nm Excitation; 510/42  
640 nm Emission) (ThermoFisher Scientific; Catalogue #AMEP4651).

#### 641 **Flow Cytometry.**

642 For yeast cell cycle examination using Flow cytometry, the protocol by Harari et  
643 al. 2018 (69) was used. Briefly, For a given time point, cells were spun down,  
644 washed with 200 µL TE solution (10mM Tris-HCl pH 7.5, 1mM EDTA),  
645 resuspended in 60 µL of TE, and fixated by adding 140 µL of absolute cold  
646 ethanol and incubated overnight at 4°C. Cells were then washed twice using TE  
647 buffer, resuspended in 100 µL of TE-RNase solution (10mM Tris-HCl pH 7.5,  
648 1mM EDTA, and 0.25mg/mL RNase) incubated for 2 h at 37°C. Cells were then  
649 rewashed using TE buffer, resuspended in 200 µL of proteinase-K solution  
650 (10mM Tris-HCl pH 7.5, 1mM EDTA, and 0.25mg/mL proteinase-K) incubated for  
651 2 h at 37°C. Cells were then again washed using TE buffer and resuspended in  
652 200 µL of TE-PI buffer (Tris EDTA and 20 µg/mL Propidium-iodide) and  
653 incubated overnight at 4°C in the dark. Before measuring, samples were  
654 sonicated three times for 2s at 20% intensity and checked under the microscope  
655 for the absence of cell clusters/doublets. All samples were analyzed using a Flow  
656 cytometry MACSQuant system, and Flow data were analyzed using FlowJo  
657 programs. Doublets were eliminated using a pulse geometry gate (FSC-H x FSC-  
658 A). In order to measure the mean fluorescent intensity, yeast cells carrying the

659 GFP/mCherry plasmids were harvested in the mid-log phase (O.D600 ~ 0.6) and  
660 washed twice with TE buffer (10mM Tris-HCl pH 7.5, 1mM EDTA) and subjected  
661 to flow cytometer after resuspending in TE buffer. Around 25000 events were  
662 monitored, and samples were analyzed using the FlowJo program. The events  
663 were aligned on the ds-Red\_txRed-H channel for mCherry and GFP\_FITC-H for  
664 eGFP. Five independent (n=5) replicates were performed for all samples.

### 665 **Chromatin Fractionation**

666 The protocol used for chromatin enrichment is described in (70). Around 40 OD  
667 cells were harvested from a logarithmically growing yeast culture and  
668 resuspended in 1 mL of pre-spheroplasting buffer (100 mM PIPES/KOH, pH 9.4,  
669 10 mM DTT, 0.1% sodium azide). Cells were transferred to 1.5 ml tubes and  
670 incubated on ice for 10min with a brief vortex in between. Next, cells were  
671 suspended in spheroplasting buffer (50 mM KH<sub>2</sub>PO<sub>4</sub>/K<sub>2</sub>HPO<sub>4</sub>, pH 7.4, 0.8 M  
672 sorbitol, 10 mM DTT, 0.1% sodium azide) containing 200 µg/ml Zymolyase-100T  
673 at 30°C for 30 mins on a roller at slow speed. The spheroplasts were confirmed  
674 microscopically, and protocol from (70) was followed afterward. The Histone H3  
675 and Rps6 were used as a control for chromatin enrichment.

### 676 **Protein extraction, Western blotting, antibodies, and band quantitation.**

677 Cells equivalents of 3 OD<sub>600</sub> were pelleted and stored at -80°C. Proteins were  
678 extracted from cells as described previously (71) using either a tri-chloroacetic  
679 acid method(72). To resolve Pds5, Mcd1, and Tubulin, 8% SDS-polyacrylamide  
680 gels were used. Immunoblotting was done as described previously. To detect  
681 proteins, the following primary antibodies were used: Anti-Mcd1 (1:10000), Anti-  
682 sV5 Santa Cruz (sc-58052) (1:1000), Anti-Actin Abcam (Ab8226)1:1000, Anti-  
683 tubulin (1:1000), Anti-GFP Abcam (Ab290) 1:1000. Anti-H3 (ab1791) Abcam  
684 1:1000, Anti-RPS6 (ab40820) Abcam 1:1000, Anti-PCNA (ab70472) Abcam  
685 1:1000 Anti-MYC (9E10, SC-40) Santa Cruz 1:1000 and Anti-HA (sc7392) Santa  
686 Cruz 1:1000. Western blot bands were quantified with ImageJ ([www.imagej.net](http://www.imagej.net)).



687 **ACKNOWLEDGMENT:** We thank Doug Koshland for support, ideas and  
688 comments on the paper. We thank all members of the Kupiec lab and Koshland  
689 lab for helpful discussions and encouragement. Work in the Kupiec lab was  
690 supported by grants from the Israel Science Foundation, the Israel Cancer  
691 Research Fund and the Minerva Stiftung.

692

693 **COMPETING INTEREST STATEMENT:** None declared

694

695

696 **REFERENCES:**

- 697 1. Onn I, Heidinger-Pauli JM, Guacci V, Ünal E, Koshland DE. 2008. Sister  
698 chromatid cohesion: A simple concept with a complex reality. *Annu Rev*  
699 *Cell Dev Biol* <https://doi.org/10.1146/annurev.cellbio.24.110707.175350>.
- 700 2. Barrington C, Finn R, Hadjur S. 2017. Cohesin biology meets the loop  
701 extrusion model. *Chromosom Res* [https://doi.org/10.1007/s10577-017-](https://doi.org/10.1007/s10577-017-9550-3)  
702 [9550-3](https://doi.org/10.1007/s10577-017-9550-3).
- 703 3. Matityahu A, Onn I. 2021. Hit the brakes - A new perspective on the loop  
704 extrusion mechanism of cohesin and other SMC complexes. *J Cell Sci* 134.
- 705 4. Peters JM, Nishiyama T. 2012. Sister chromatid cohesion. *Cold Spring*  
706 *Harb Perspect Biol* 4.
- 707 5. Uhlmann F. 2016. SMC complexes: From DNA to chromosomes. *Nat Rev*  
708 *Mol Cell Biol* <https://doi.org/10.1038/nrm.2016.30>.
- 709 6. Hartman T, Stead K, Koshland D, Guacci V. 2000. Pds5p is an essential  
710 chromosomal protein required for both sister chromatid cohesion and  
711 condensation in *Saccharomyces cerevisiae*. *J Cell Biol*  
712 <https://doi.org/10.1083/jcb.151.3.613>.

- 713 7. Lee BG, Roig MB, Jansma M, Petela N, Metson J, Nasmyth K, Löwe J.  
714 2016. Crystal Structure of the Cohesin Gatekeeper Pds5 and in Complex  
715 with Kleisin Scc1. *Cell Rep* 14:2108–2115.
- 716 8. Muir KW, Kschonsak M, Li Y, Metz J, Haering CH, Panne D. 2016.  
717 Structure of the Pds5-Scc1 Complex and Implications for Cohesin  
718 Function. *Cell Rep* 14:2116–2126.
- 719 9. Zhang N, Coutinho LE, Pati D. 2021. Pds5a and pds5b in cohesin function  
720 and human disease. *Int J Mol Sci* <https://doi.org/10.3390/ijms22115868>.
- 721 10. Panizza S, Tanaka T, Hochwagen A, Eisenhaber F, Nasmyth K. 2000.  
722 Pds5 cooperates with cohesion in maintaining sister chromatid cohesion.  
723 *Curr Biol* 10:1557–1564.
- 724 11. Vaur S, Feytout A, Vazquez S, Javerzat JP. 2012. Pds5 promotes cohesin  
725 acetylation and stable cohesin-chromosome interaction. *EMBO Rep*  
726 <https://doi.org/10.1038/embor.2012.72>.
- 727 12. Sutani T, Kawaguchi T, Kanno R, Itoh T, Shirahige K. 2009. Budding Yeast  
728 Wpl1(Rad61)-Pds5 Complex Counteracts Sister Chromatid Cohesion-  
729 Establishing Reaction. *Curr Biol* <https://doi.org/10.1016/j.cub.2009.01.062>.
- 730 13. Arbel M, Choudhary K, Tfilin O, Kupiec M. 2021. PCNA loaders and  
731 unloaders—One ring that rules them all. *Genes (Basel)*  
732 <https://doi.org/10.3390/genes12111812>.
- 733 14. Ben-shahar TR, Heeger S, Lehane C, East P, Flynn H, Skehel M, Uhlmann  
734 F. 2008. Eco1-Dependent Cohesin Sister Chromatid Cohesion. *Science*  
735 (80- ) 321:563–566.
- 736 15. Skibbens R V., Corson LB, Koshland D, Hieter P. 1999. Ctf7p is essential  
737 for sister chromatid cohesion and links mitotic chromosome structure to the  
738 DNA replication machinery. *Genes Dev*  
739 <https://doi.org/10.1101/gad.13.3.307>.

- 740 16. Moldovan GL, Pfander B, Jentsch S. 2006. PCNA Controls Establishment  
741 of Sister Chromatid Cohesion during S Phase. *Mol Cell*  
742 <https://doi.org/10.1016/j.molcel.2006.07.007>.
- 743 17. Çamdere G, Guacci V, Stricklin J, Koshland D. 2015. The ATPases of  
744 cohesin interface with regulators to modulate cohesin-mediated DNA  
745 tethering. *Elife* 4.
- 746 18. Elbatsh AMO, Haarhuis JHI, Petela N, Chapard C, Fish A, Celie PH,  
747 Stadnik M, Ristic D, Wyman C, Medema RH, Nasmyth K, Rowland BD.  
748 2016. Cohesin Releases DNA through Asymmetric ATPase-Driven Ring  
749 Opening. *Mol Cell* 61:575–588.
- 750 19. Guacci V, Stricklin J, Bloom MS, Guo X, Bhattar M, Koshland D. 2015. A  
751 novel mechanism for the establishment of sister chromatid cohesion by the  
752 ECO1 acetyltransferase. *Mol Biol Cell* 26:117–133.
- 753 20. D'Ambrosio LM, Lavoie BD. 2014. Pds5 Prevents the PolySUMO-  
754 Dependent Separation of Sister Chromatids. *Curr Biol* 24:361–371.
- 755 21. Psakhye I, Branzei D. 2021. SMC complexes are guarded by the SUMO  
756 protease Ulp2 against SUMO-chain-mediated turnover. *Cell Rep* 36.
- 757 22. Tong K, Skibbens R V. 2015. Pds5 regulators segregate cohesion and  
758 condensation pathways in *Saccharomyces cerevisiae*. *Proc Natl Acad Sci*  
759 *U S A* <https://doi.org/10.1073/pnas.1501369112>.
- 760 23. Kupiec M. 2016. Alternative clamp loaders/unloaders. *FEMS Yeast Res* 16.
- 761 24. Ben-Aroya S, Koren A, Liefshitz B, Steinlauf R, Kupiec M. 2003. ELG1, a  
762 yeast gene required for genome stability, forms a complex related to  
763 replication factor C. *Proc Natl Acad Sci U S A* 100:9906–9911.
- 764 25. Bell DW, Sikdar N, Lee KY, Price JC, Chatterjee R, Park HD, Fox J, Ishiai  
765 M, Rudd ML, Pollock LM, Fogoros SK, Mohamed H, Hanigan CL, NISC

- 766 Comparative Sequencing Program, Zhang S, Cruz P, Renaud G, Hansen  
767 NF, Cherukuri PF, Borate B, McManus KJ, Stoepel J, Sipahimalani P,  
768 Godwin AK, Sgroi DC, Merino MJ, Elliot G, Elkahloun A, Vinson C, Takata  
769 M, Mullikin JC, Wolfsberg TG, Hieter P, Lim DS, Myung K. 2011.  
770 Predisposition to cancer caused by genetic and functional defects of  
771 mammalian *atad5*. *PLoS Genet* 7.
- 772 26. Parnas O, Zipin-Roitman A, Pfander B, Liefshitz B, Mazor Y, Ben-Aroya S,  
773 Jentsch S, Kupiec M. 2010. Elg1, an alternative subunit of the RFC clamp  
774 loader, preferentially interacts with SUMOylated PCNA. *EMBO J*  
775 <https://doi.org/10.1038/emboj.2010.128>.
- 776 27. Kanellis P, Agyei R, Durocher D. 2003. Elg1 forms an alternative PCNA-  
777 interacting RFC complex required to maintain genome stability. *Curr Biol*  
778 [https://doi.org/10.1016/S0960-9822\(03\)00578-5](https://doi.org/10.1016/S0960-9822(03)00578-5).
- 779 28. Parnas O, Zipin-Roitman A, Mazor Y, Liefshitz B, Ben-Aroya S, Kupiec M.  
780 2009. The Elg1 clamp loader plays a role in sister chromatid cohesion.  
781 *PLoS One* <https://doi.org/10.1371/journal.pone.0005497>.
- 782 29. Maradeo ME, Skibbens R V. 2010. Replication factor C complexes play  
783 unique pro- and anti-establishment roles in sister chromatid cohesion.  
784 *PLoS One* <https://doi.org/10.1371/journal.pone.0015381>.
- 785 30. Hartman T, Stead K, Koshland D, Guacci V. 2000. Pds5p is an essential  
786 chromosomal protein required for both sister chromatid cohesion and  
787 condensation in *Saccharomyces cerevisiae*. *J Cell Biol* 151:613–626.
- 788 31. Carretero M, Ruiz-Torres M, Rodríguez-Corsino M, Barthelemy I, Losada  
789 A. 2013. Pds5B is required for cohesion establishment and Aurora B  
790 accumulation at centromeres. *EMBO J* 32:2938–2949.
- 791 32. Jones GM, Stalker J, Humphray S, West A, Cox T, Rogers J, Dunham I,  
792 Prelich G. 2008. A systematic library for comprehensive overexpression

- 793 screens in *Saccharomyces cerevisiae*. *Nat Methods* 5:239–241.
- 794 33. Ünal E, Heidinger-Pauli JM, Kim W, Guacci V, Onn I, Gygi SP, Koshland  
795 DE. 2008. A molecular determinant for the establishment of sister  
796 chromatid cohesion. *Science* (80- )  
797 <https://doi.org/10.1126/science.1157880>.
- 798 34. Haering CH, Schoffnegger D, Nishino T, Helmhart W, Nasmyth K, Löwe J.  
799 2004. Structure and stability of cohesin's Smc1-kleisin interaction. *Mol Cell*  
800 15:951–964.
- 801 35. Chan KL, Gligoris T, Upcher W, Kato Y, Shirahige K, Nasmyth K, Beckouët  
802 F. 2013. Pds5 promotes and protects cohesin acetylation. *Proc Natl Acad*  
803 *Sci U S A* 110:13020–13025.
- 804 36. Quilis I, Igual JC. 2012. Molecular basis of the functional distinction  
805 between Cln1 and Cln2 cyclins. *Cell Cycle* 11:3117–3131.
- 806 37. Teufel L, Tummeler K, Flöttmann M, Herrmann A, Barkai N, Klipp E. 2019. A  
807 transcriptome-wide analysis deciphers distinct roles of G1 cyclins in  
808 temporal organization of the yeast cell cycle. *Sci Rep* 9.
- 809 38. Enserink JM, Kolodner RD. 2010. An overview of Cdk1-controlled targets  
810 and processes. *Cell Div* <https://doi.org/10.1186/1747-1028-5-11>.
- 811 39. Skotheim JM, Di Talia S, Siggia ED, Cross FR. 2008. Positive feedback of  
812 G1 cyclins ensures coherent cell cycle entry. *Nature* 454:291–296.
- 813 40. de Bruin RAM, Kalashnikova TI, Wittenberg C. 2008. Stb1 Collaborates  
814 with Other Regulators To Modulate the G 1 -Specific Transcriptional Circuit  
815 . *Mol Cell Biol* 28:6919–6928.
- 816 41. Vallen EA, Cross FR. 1999. Interaction between the MEC1-dependent  
817 DNA synthesis checkpoint and G1 cyclin function in *Saccharomyces*  
818 *cerevisiae*. *Genetics* 151:459–471.

- 819 42. Guacci V, Chatterjee F, Robison B, Koshland DE. 2019. Communication  
820 between distinct subunit interfaces of the cohesin complex promotes its  
821 topological entrapment of DNA. *Elife* 8.
- 822 43. Straight AF, Belmont AS, Robinett CC, Murray AW. 1996. GFP tagging of  
823 budding yeast chromosomes reveals that protein-protein interactions can  
824 mediate sister chromatid cohesion. *Curr Biol*  
825 [https://doi.org/10.1016/S0960-9822\(02\)70783-5](https://doi.org/10.1016/S0960-9822(02)70783-5).
- 826 44. Kubota T, Nishimura K, Kanemaki MT, Donaldson AD. 2013. The Elg1  
827 Replication Factor C-like Complex Functions in PCNA Unloading during  
828 DNA Replication. *Mol Cell* <https://doi.org/10.1016/j.molcel.2013.02.012>.
- 829 45. Parnas O, Zipin-Roitman A, Pfander B, Liefshitz B, Mazor Y, Ben-Aroya S,  
830 Jentsch S, Kupiec M. 2010. Elg1, an alternative subunit of the RFC clamp  
831 loader, preferentially interacts with SUMOylated PCNA. *EMBO J* 29:2611–  
832 2622.
- 833 46. Shemesh K, Sebesta M, Pacesa M, Sau S, Bronstein A, Parnas O,  
834 Liefshitz B, Venclovas Č, Krejci L, Kupiec M. 2017. A structure-function  
835 analysis of the yeast Elg1 protein reveals the importance of PCNA  
836 unloading in genome stability maintenance. *Nucleic Acids Res*  
837 <https://doi.org/10.1093/nar/gkw1348>.
- 838 47. Kang MS, Ryu E, Lee SW, Park J, Ha NY, Ra JS, Kim YJ, Kim J, Abdel-  
839 Rahman M, Park SH, Lee K young, Kim H, Kang S, Myung K. 2019.  
840 Regulation of PCNA cycling on replicating DNA by RFC and RFC-like  
841 complexes. *Nat Commun* <https://doi.org/10.1038/s41467-019-10376-w>.
- 842 48. Johnson C, Gali VK, Takahashi TS, Kubota T. 2016. PCNA Retention on  
843 DNA into G2/M Phase Causes Genome Instability in Cells Lacking Elg1.  
844 *Cell Rep* 16:684–695.
- 845 49. Zhang W, Qin Z, Zhang X, Xiao W. 2011. Roles of sequential ubiquitination

- 846 of PCNA in DNA-damage tolerance. FEBS Lett  
847 <https://doi.org/10.1016/j.febslet.2011.04.044>.
- 848 50. Pfander B, Moldovan GL, Sacher M, Hoege C, Jentsch S. 2005. SUMO-  
849 modified PCNA recruits Srs2 to prevent recombination during S phase.  
850 Nature 436:428–433.
- 851 51. Qiu Y, Antony E, Doganay S, Ran Koh H, Lohman TM, Myong S. 2013.  
852 Srs2 prevents Rad51 filament formation by repetitive motion on DNA. Nat  
853 Commun 4.
- 854 52. Mayer ML, Pot I, Chang M, Xu H, Aneliunas V, Kwok T, Newitt R,  
855 Aebersold R, Boone C, Brown GW, Hieter P. 2004. Identification of Protein  
856 Complexes Required for Efficient Sister Chromatid Cohesion. Mol Biol Cell  
857 <https://doi.org/10.1091/mbc.E03-08-0619>.
- 858 53. Warren CD, Eckley DM, Lee MS, Hanna JS, Hughes A, Peyser B, Jie C,  
859 Irizarry R, Spencer FA. 2004. S-Phase Checkpoint Genes Safeguard High-  
860 Fidelity Sister Chromatid Cohesion. Mol Biol Cell  
861 <https://doi.org/10.1091/mbc.E03-09-0637>.
- 862 54. Su XA, Ma D, Parsons J V., Replogle JM, Amatruda JF, Whittaker CA,  
863 Stegmaier K, Amon A. 2021. RAD21 is a driver of chromosome 8 gain in  
864 Ewing sarcoma to mitigate replication stress. Genes Dev  
865 <https://doi.org/10.1101/gad.345454.120>.
- 866 55. Heidinger-Pauli JM, Mert O, Davenport C, Guacci V, Koshland D. 2010.  
867 Systematic Reduction of Cohesin Differentially Affects Chromosome  
868 Segregation, Condensation, and DNA Repair. Curr Biol 20:957–963.
- 869 56. Costantino L, Hsieh THS, Lamothe R, Darzacq X, Koshland D. 2020.  
870 Cohesin residency determines chromatin loop patterns. Elife 9:1–31.
- 871 57. Dauban L, Montagne R, Thierry A, Lazar-Stefanita L, Bastié N, Gadal O,  
872 Cournac A, Koszul R, Beckouët F. 2020. Regulation of Cohesin-Mediated

- 873 Chromosome Folding by Eco1 and Other Partners. *Mol Cell* 77:1279–  
874 1293.e4.
- 875 58. Wutz G, Várnai C, Nagasaka K, Cisneros DA, Stocsits RR, Tang W,  
876 Schoenfelder S, Jessberger G, Muhar M, Hossain MJ, Walther N, Koch B,  
877 Kueblbeck M, Ellenberg J, Zuber J, Fraser P, Peters J. 2017. Topologically  
878 associating domains and chromatin loops depend on cohesin and are  
879 regulated by CTCF, WAPL, and PDS5 proteins. *EMBO J* 36:3573–3599.
- 880 59. Li P, Hao Z, Zeng F. 2021. Tumor suppressor stars in yeast G1/S  
881 transition. *Curr Genet* <https://doi.org/10.1007/s00294-020-01126-3>.
- 882 60. Tyers M, Tokiwa G, Futcher B. 1993. Comparison of the *Saccharomyces*  
883 *cerevisiae* G1 cyclins: Cln3 may be an upstream activator of cln1, cln2 and  
884 other cyclins. *EMBO J* 12:1955–1968.
- 885 61. Barberis M. 2012. Sic1 as a timer of Clb cyclin waves in the yeast cell cycle  
886 - Design principle of not just an inhibitor, p. 3386–3410. *In* *FEBS Journal*.
- 887 62. Liu HW, Bouchoux C, Panarotto M, Kakui Y, Patel H, Uhlmann F. 2020.  
888 Division of Labor between PCNA Loaders in DNA Replication and Sister  
889 Chromatid Cohesion Establishment. *Mol Cell*  
890 <https://doi.org/10.1016/j.molcel.2020.03.017>.
- 891 63. Marini V, Krejci L. 2010. Srs2: The “Odd-Job Man” in DNA repair. *DNA*  
892 *Repair (Amst)* <https://doi.org/10.1016/j.dnarep.2010.01.007>.
- 893 64. Niu H, Klein HL. 2017. Multifunctional roles of *Saccharomyces cerevisiae*  
894 Srs2 protein in replication, recombination and repair. *FEMS Yeast Res*  
895 <https://doi.org/10.1093/femsyr/fow111>.
- 896 65. Murayama Y, Samora CP, Kurokawa Y, Iwasaki H, Uhlmann F. 2018.  
897 Establishment of DNA-DNA Interactions by the Cohesin Ring. *Cell*  
898 172:465–477.e15.



- 899 66. Liu W, Biton E, Pathania A, Matityahu A, Irudayaraj J, Onn I. 2020.  
900 Monomeric cohesin state revealed by live-cell single-molecule  
901 spectroscopy. EMBO Rep 21.
- 902 67. Maradeo ME, Skibbens R V. 2009. The Elg1-RFC clamp-loading complex  
903 performs a role in sister chromatid cohesion. PLoS One  
904 <https://doi.org/10.1371/journal.pone.0004707>.
- 905 68. Baym M, Kryazhimskiy S, Lieberman TD, Chung H, Desai MM, Kishony  
906 RK. 2015. Inexpensive multiplexed library preparation for megabase-sized  
907 genomes. PLoS One <https://doi.org/10.1371/journal.pone.0128036>.
- 908 69. Harari Y, Ram Y, Rappoport N, Hadany L, Kupiec M. 2018. Spontaneous  
909 Changes in Ploidy Are Common in Yeast. Curr Biol 28:825–835.e4.
- 910 70. Reyes GX, Kolodziejczak A, Devakumar LJPS, Kubota T, Kolodner RD,  
911 Putnam CD, Hombauer H. 2021. Ligation of newly replicated DNA controls  
912 the timing of DNA mismatch repair. Curr Biol 31:1268–1276.e6.
- 913 71. Cohen A, Kupiec M, Weisman R. 2016. Gad8 protein is found in the  
914 nucleus where it interacts with the Mlul cell cycle box-binding factor (MBF)  
915 transcriptional complex to regulate the response to DNA replication stress.  
916 J Biol Chem 291:9371–9381.
- 917 72. Cohen A, Kupiec M, Weisman R. 2016. Gad8 protein is found in the  
918 nucleus where it interacts with the Mlul cell cycle box-binding factor (MBF)  
919 transcriptional complex to regulate the response to DNA replication stress.  
920 J Biol Chem <https://doi.org/10.1074/jbc.M115.705251>.

921

## 922 **FIGURE LEGENDS:**

923 **Figure 1. Screen for suppressors of the *pds5Δ elg1Δ* double mutant. A)**  
924 Illustration of the experimental scheme for the high copy number suppressor

925 screen. **B)** Fivefold serial dilutions of cells harboring either empty vector or high  
926 copy number vectors overexpressing *MCD1* or *PDS5* in addition to the covering  
927 plasmid (carrying the *URA3* and *PDS5* genes). **C), D)** Spot assay with fivefold  
928 serial dilutions of cells harboring either empty vector or high copy number  
929 plasmids overexpressing *MCD1* with different mutations at specified residues in  
930 addition to the covering plasmid (carrying the *URA3* and *PDS5* genes) **E)**  
931 Experimental regimen of a screen looking for the spontaneous suppressor  
932 mutants able to grow in the complete absence of *PDS5* and *ELG1*. **F)** Spot assay  
933 with fivefold serial dilutions spot assay of the *pds5Δ* background strains carrying  
934 specified gene deletions on –Ura and 5-FOA plates. All mentioned strains carry a  
935 Pds5 covering plasmid (carrying the *URA3* selection marker).

936 **Figure 2. Deletion of *ELG1* and *CLN2* restores the Mcd1 protein level in the**  
937 **absence of Pds5. A)** Western blot showing the Mcd1 protein level in different  
938 *PDS-AID* strains. Cells were harvested after arresting them in the G2/M phase by  
939 treatment with nocodazole (15 μg/ml) for 2h, followed by the treatment with auxin  
940 (IAA, 300 μM). The experimental scheme is represented below the western blot  
941 panel. Mcd1 was probed with an anti-Mcd1 antibody, Pds5 was detected using  
942 anti-V5, and Tubulin was used as a loading control. **B)** Mcd1 protein levels  
943 normalized to those of Tubulin (mean ± SD; n=3). T-test analysis p-value \*\* ≤  
944 0.01. **C-E)** Western blot for the auxin-chase experiment. The cells of the  
945 indicated strains were grown until the log phase (time 0) and then treated with  
946 Auxin (IAA, 300 μM). Samples were taken every 20 minutes until completing a 2  
947 hours experiment. **F)** Relative levels of Mcd1 protein normalized to those of  
948 Tubulin used as a loading control (n=3; % mean ±SD).

949 **Figure 3. Mcd1 is overexpressed in *elg1Δ cln2Δ* double mutants. A)** GFP-  
950 RFP plasmid with a short-lived GFP gene under the control of the Mcd1 promoter  
951 and internal control mCherry under the control of ADH1 promoter. **B)** Mean  
952 fluorescent intensity GFP/mCherry ratio from flow cytometry for different strains  
953 treated with Auxin (IAA 300μM for 2hrs (Right) and without Auxin (Left) (20,000  
954 events, n=3). One way Anova p value \*\*\* ≤ 0.001. **C)** Western blot (anti-GFP)

955 monitoring the GFP fused to CL1 degron protein levels in different strains  
956 expressed from a 2 $\mu$  plasmid. Actin was used as a loading control. **D)** Western  
957 blot quantification of GFP levels normalized to the loading control actin. (Mean  $\pm$   
958 SD; n=3). T test analysis p value \*\*\*  $\leq$  0.001 **E)** Western blot (anti-GFP)  
959 monitoring the GFP-CL1 fusion protein levels expressed from a construct  
960 carrying a mentioned deletion in the MCB box in Mcd1 promoter. **F)** Western blot  
961 quantification of GFP levels normalized to the loading control actin. (Mean  $\pm$  SD;  
962 n=3). One way Anova p value \*\*\*  $\leq$  0.001

963

964 **Figure 4. Deletion of *ELG1* and *CLN2* restores the sister chromatid**  
965 **cohesion defects in the absence of Pds5.**

966 **Cohesion establishment analysis:** Top panel- Experimental scheme for the  
967 cohesion establishment assay. **A)** Percentage of cells with 2 dots in mid-M phase  
968 without auxin treatment (n=3 with >200 cells per strain and experiment; mean  $\pm$   
969 SD) **B)** Establishment assay for auxin treated cells.  $\alpha$ -Factor: **50** ng/mL; NOC:  
970 nocodazole 15  $\mu$ g/ml; PRON: pronase E 0.1 mg/ml. **Cohesion maintenance**  
971 **analysis** Mid panel-Experimental scheme for cohesion maintenance assay with  
972 AUXIN (IAA, 300  $\mu$ M). The untreated experimental process was the same but  
973 without auxin. **C)** Percentage of cells with 2 dots for every strain without auxin  
974 treatment (n=3 with 200 cells per strain and experiment; mean  $\pm$  SD) **D)**  
975 maintenance assay for auxin-treated cells in different strains. NOC: nocodazole  
976 15  $\mu$ g/ml.

977 **Figure 5. PCNA accumulation on chromatin promotes sister chromatid**  
978 **cohesion in the absence of Pds5: A)** Spot assay with fivefold serial dilution of  
979 *pds5 $\Delta$  cln2 $\Delta$  +(CEN PDS5 URA)* strain carrying different mutants of Elg1 at the  
980 *ELG1* locus in the genome; on 5-FOA medium and plates containing the DNA  
981 damaging agent MMS at mentioned concentration. **B)** Spot assay with fivefold  
982 serial dilution of *pds5 $\Delta$  cln2 $\Delta$  elg1 $\Delta$  +(CEN PDS5 URA)* background strain  
983 harboring disassembly prone PCNA mutations in the genomic copy of the *POL30*

984 gene on 5-FOA plates. **C)** Chromatin Fractionation experiment showing the  
985 Eco1-3HA levels on chromatin in untreated and auxin (2hrs) - treated samples.  
986 Histone H3 was used as a chromatin marker and loading control, Rps6 was used  
987 as a cytoplasmic marker. **D)** The Graph represents the western blot quantification  
988 of the relative abundance of Eco1 protein on chromatin. (Mean  $\pm$  SD; n=3).  
989 Student's t-test ns= non-significant.

990 **Figure 6. Sumo-PCNA accumulation on chromatin and Srs2 promote sister**  
991 **chromatid cohesion in absence of Pds5: A)** Spot assay with fivefold serial  
992 dilution of *Pds5* $\Delta$  *cln2* $\Delta$  *elg1* $\Delta$  +(CEN *PDS5 URA*) background strain harboring  
993 point mutations at the key Lysine residue in the genomic copy of the *POL30*  
994 gene, on 5-FOA plates. **B)** Spot assay with fivefold serial dilution of *pds5* $\Delta$  *cln2* $\Delta$   
995 *elg1* $\Delta$  +(CEN *PDS5 URA*) background carrying deletion of genes involved in  
996 PCNA ubiquitination (Rad5, Rad18) or PCNA SUMOylation pathways (Siz1) and  
997 the SUMO-PCNA interactor Srs2, on 5-FOA plates. **C)** Fivefold serial dilution of  
998 *pds5* $\Delta$  *cln2* $\Delta$  *elg1* $\Delta$  *srs2* $\Delta$  *rad51* $\Delta$  + (CEN *PDS5 URA*) and control strains on 5-  
999 FOA plates.

1000 **Figure 7. A model for the bypass of Pds5 function by *elg1* $\Delta$  *cln2* $\Delta$ .** **A)** The Wt  
1001 cells properly establish cohesion during the S-phase and maintain it throughout  
1002 the following cell cycle to allow faithful chromosome segregation. **B)** The deletion  
1003 of Pds5 results in hyper-SUMOylation of the Mcd1 cohesin subunit, leading to its  
1004 premature degradation, followed by loss of cohesion and cell death. **C)** The  
1005 deletion of the G1 cyclin Cln2 results in overproduction of Mcd1, however it  
1006 cannot produce sufficient cohesion to sustain the high cohesin turnover  
1007 associated with the loss of Pds5 protein. As a result, the *pds5* $\Delta$  *cln2* $\Delta$  strain is  
1008 inviable and show cohesion defects. **D)** The deletion of PCNA unloader Elg1  
1009 results in accumulation of SUMO-PCNA on chromatin which might allow a wider  
1010 window for cohesin establishment. However, *pds5* $\Delta$  *elg1* $\Delta$  strain is inviable due  
1011 to the insufficient levels of Mcd1 protein available during cohesion establishment.  
1012 **E)** The deletion of PCNA unloader Elg1 along with G1 cyclin Cln2 (or with Mcd1  
1013 over-expression) results in stable cohesion in the absence of the Pds5 cohesin

1014 subunit, rendering yeast cells viable. In other words, the high cohesin turnover  
1015 associate with *pds5Δ* might be compensated by over establishing functional  
1016 cohesion during DNA replication in this scenario. The SUMO-PCNA  
1017 accumulation recruits Srs2 to remove Rad51 protein from ssDNA, which might  
1018 allow the increased establishment of cohesion during DNA replication. (Estb.  
1019 Stands for establishment).

## 1020 SUPPLEMENTARY FIGURE LEGENDS:

1021 **Figure S1. Screen for the suppressors of *pds5Δ elg1Δ*.** **A)** Spot assay with  
1022 fivefold serial dilutions of the *pds5Δ* and *pds5Δ elg1Δ* strains carrying Pds5  
1023 centromeric *URA* covering plasmid on SD-Ura and 5-FOA plates. **B)** Anti-Mcd1  
1024 western blot shows the overexpression of different *mcd1* mutants in *pds5Δ* and  
1025 *pds5Δ elg1Δ* strains compared to empty vector. Actin (probed with anti-Actin Ab)  
1026 was used as a loading control. The graph below the western blot panel represent  
1027 the average (n=3, mean ± SD) fold change in the Mcd1 expression levels  
1028 compared to the empty vector. **C)** List of *de novo* mutations observed in G1  
1029 cyclin *CLN2* gene that allow the *pds5Δ elg1Δ* strain viability.

1030 **Figure S2. Auxin induced degradation of *AID-PDS5*.** **A)** Western blot showing  
1031 the degradation kinetics of Pds5 protein on addition of Auxin (IAA, 300 μM) to the  
1032 growth media. **B)** Quantification of the Pds5 protein levels at the indicated time  
1033 point normalized to the tubulin loading control (% mean ± SD; n=3). T test  
1034 analysis p value ≤ 0.01. **C)** Flow cytometry data supporting the *Figure no. 2 A, B*.  
1035 Data represents that the cells were arrested in G2/M phase while they were  
1036 harvested for protein extraction at the final time point T120min.

1037 **Figure S3. Mcd1 protein half-life unchanged in *elg1Δ cln2Δ* strain.** **A)**  
1038 Western blot for the cycloheximide chase experiments in *PDS5-AID* and *PDS5-*  
1039 *AID elg1Δ cln2Δ* strain. The cells were grown until log phase (time 0) followed by  
1040 treatment with cycloheximide CHX (250 μg/mL). Samples were taken every 20  
1041 minutes until completing a 2 hours experiment. **B)** Quantification of the Mcd1 and  
1042 Pds5 protein levels normalized to tubulin as loading control (n=3; % mean ± SD).

1043 **C)** Statistical analysis of the Mcd1 half-life by performing T test analysis (ns = not  
1044 significant). **D)** Western blot for the Auxin+ cycloheximide chase experiments in  
1045 *PDS5-AID* and *PDS5-AID elg1Δ cln2Δ* strain. The cells were grown until log  
1046 phase (time 0) followed by treatment with Auxin (IAA 300 μM) along with  
1047 cycloheximide CHX (250 μg/mL). Samples were taken every 20 minutes until  
1048 completing a 2 hours experiment. **E)** Quantification of the Mcd1 and Pds5 protein  
1049 levels normalized to tubulin as loading control (n=3; % mean ± SD). **F)** Statistical  
1050 analysis of the Mcd1 half-life by performing T test analysis (ns = not significant).

1051

1052

1053

1054

1055

1056

1057

1058

1059

1060

1061

1062

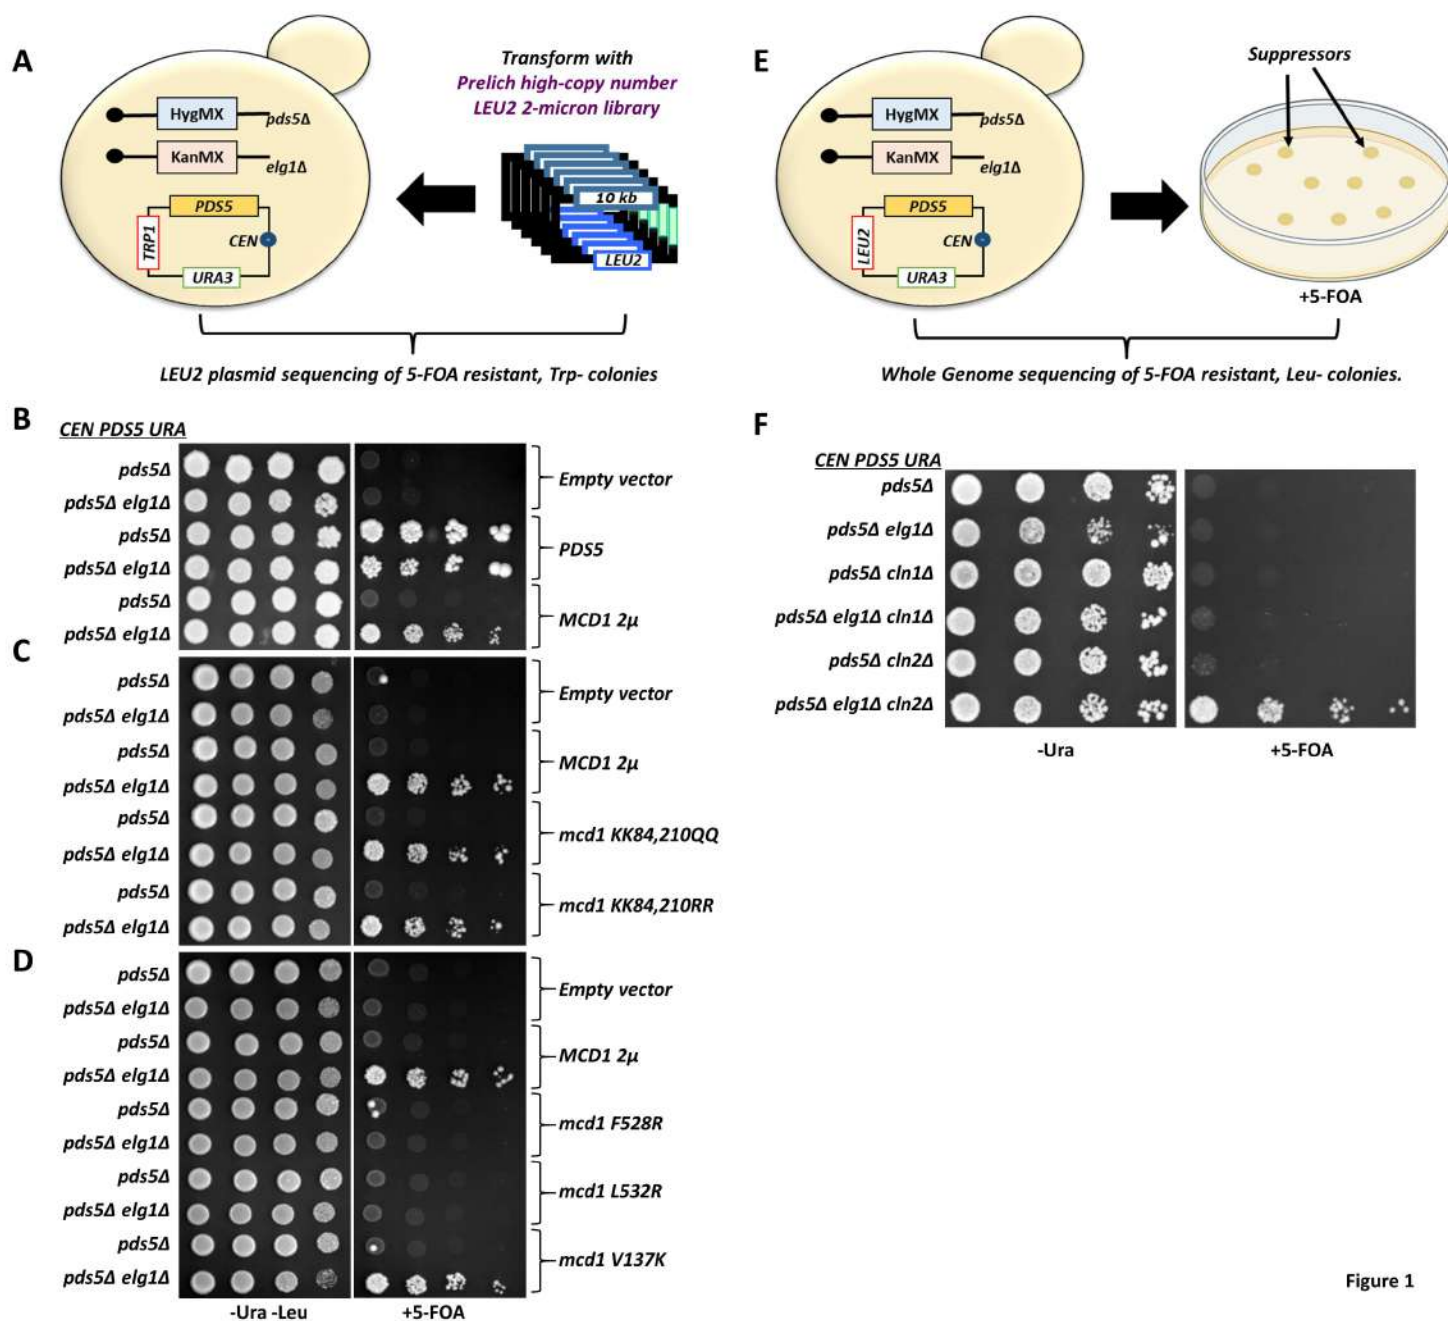

Figure 1

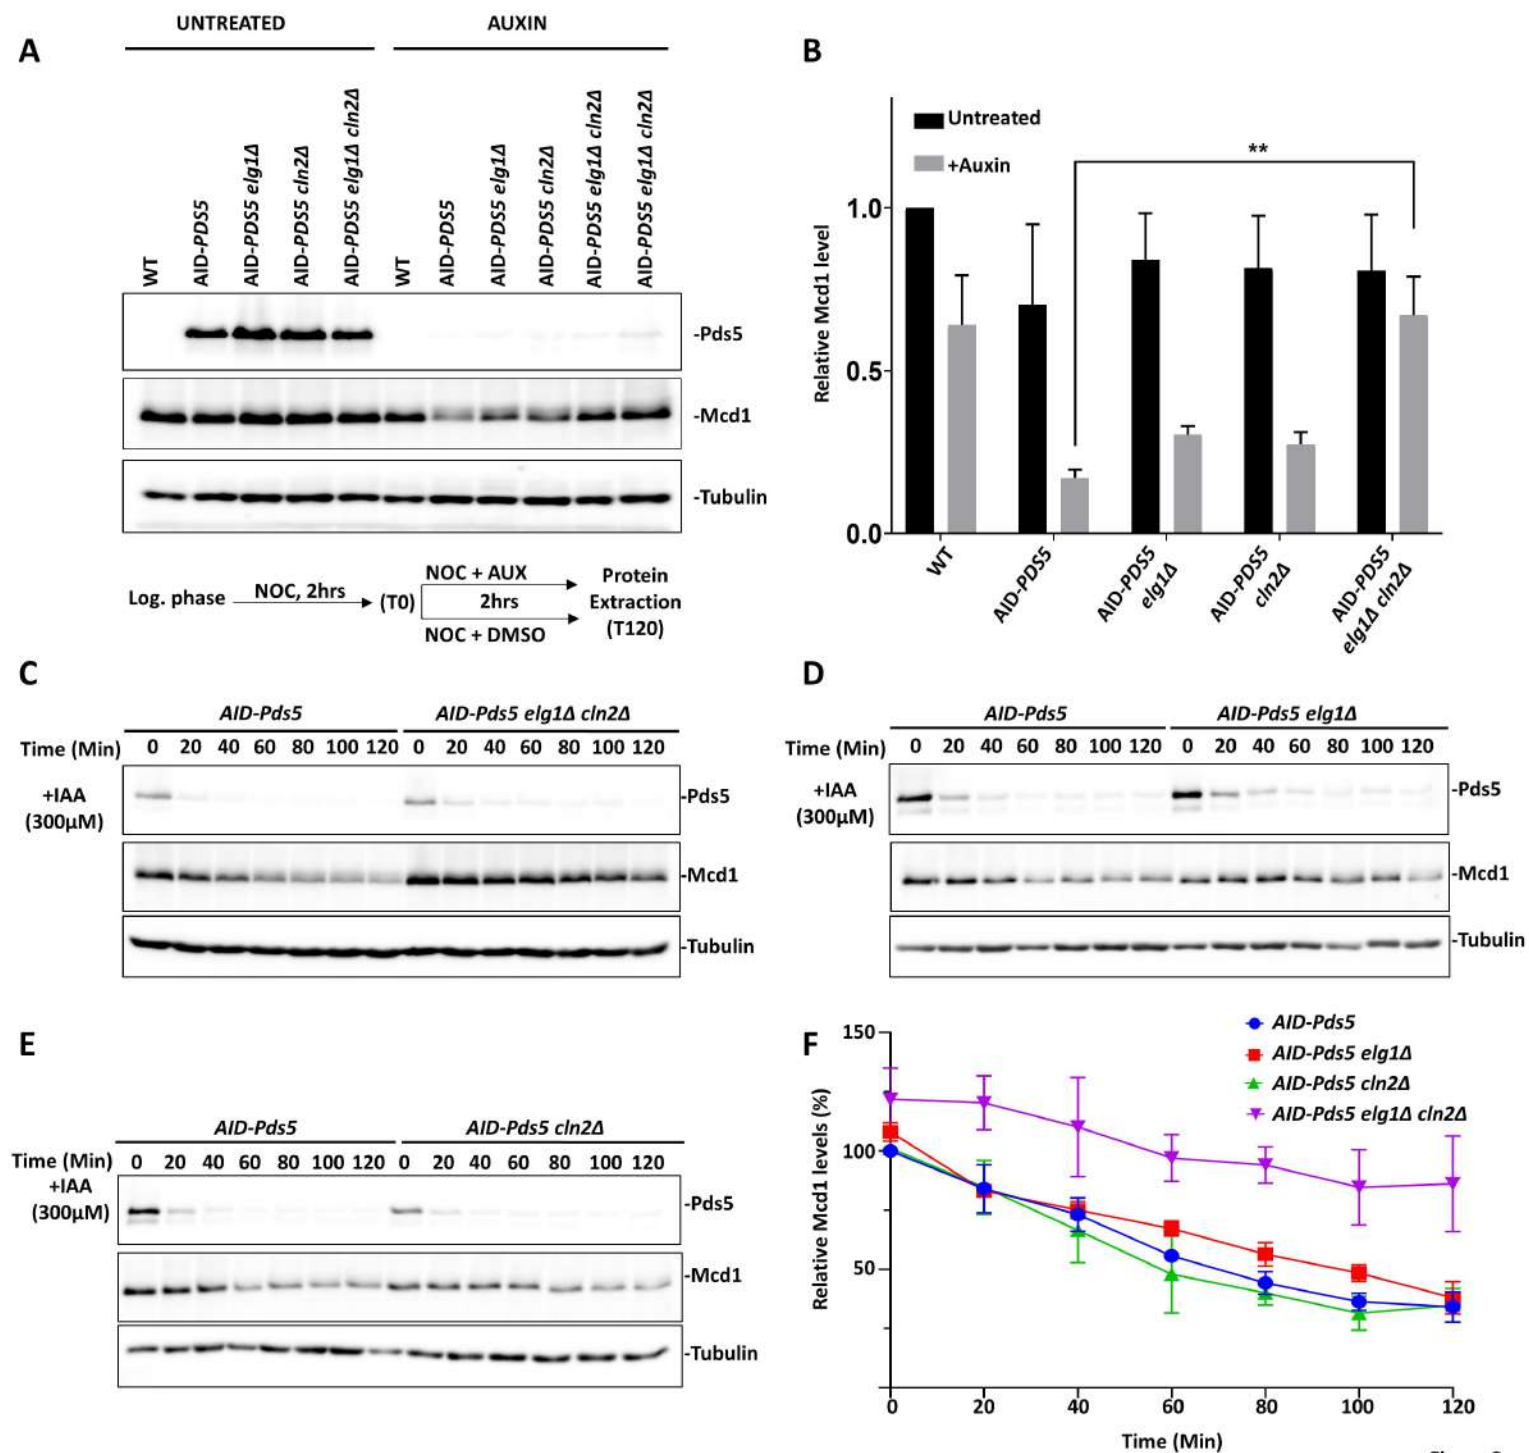

Figure 2



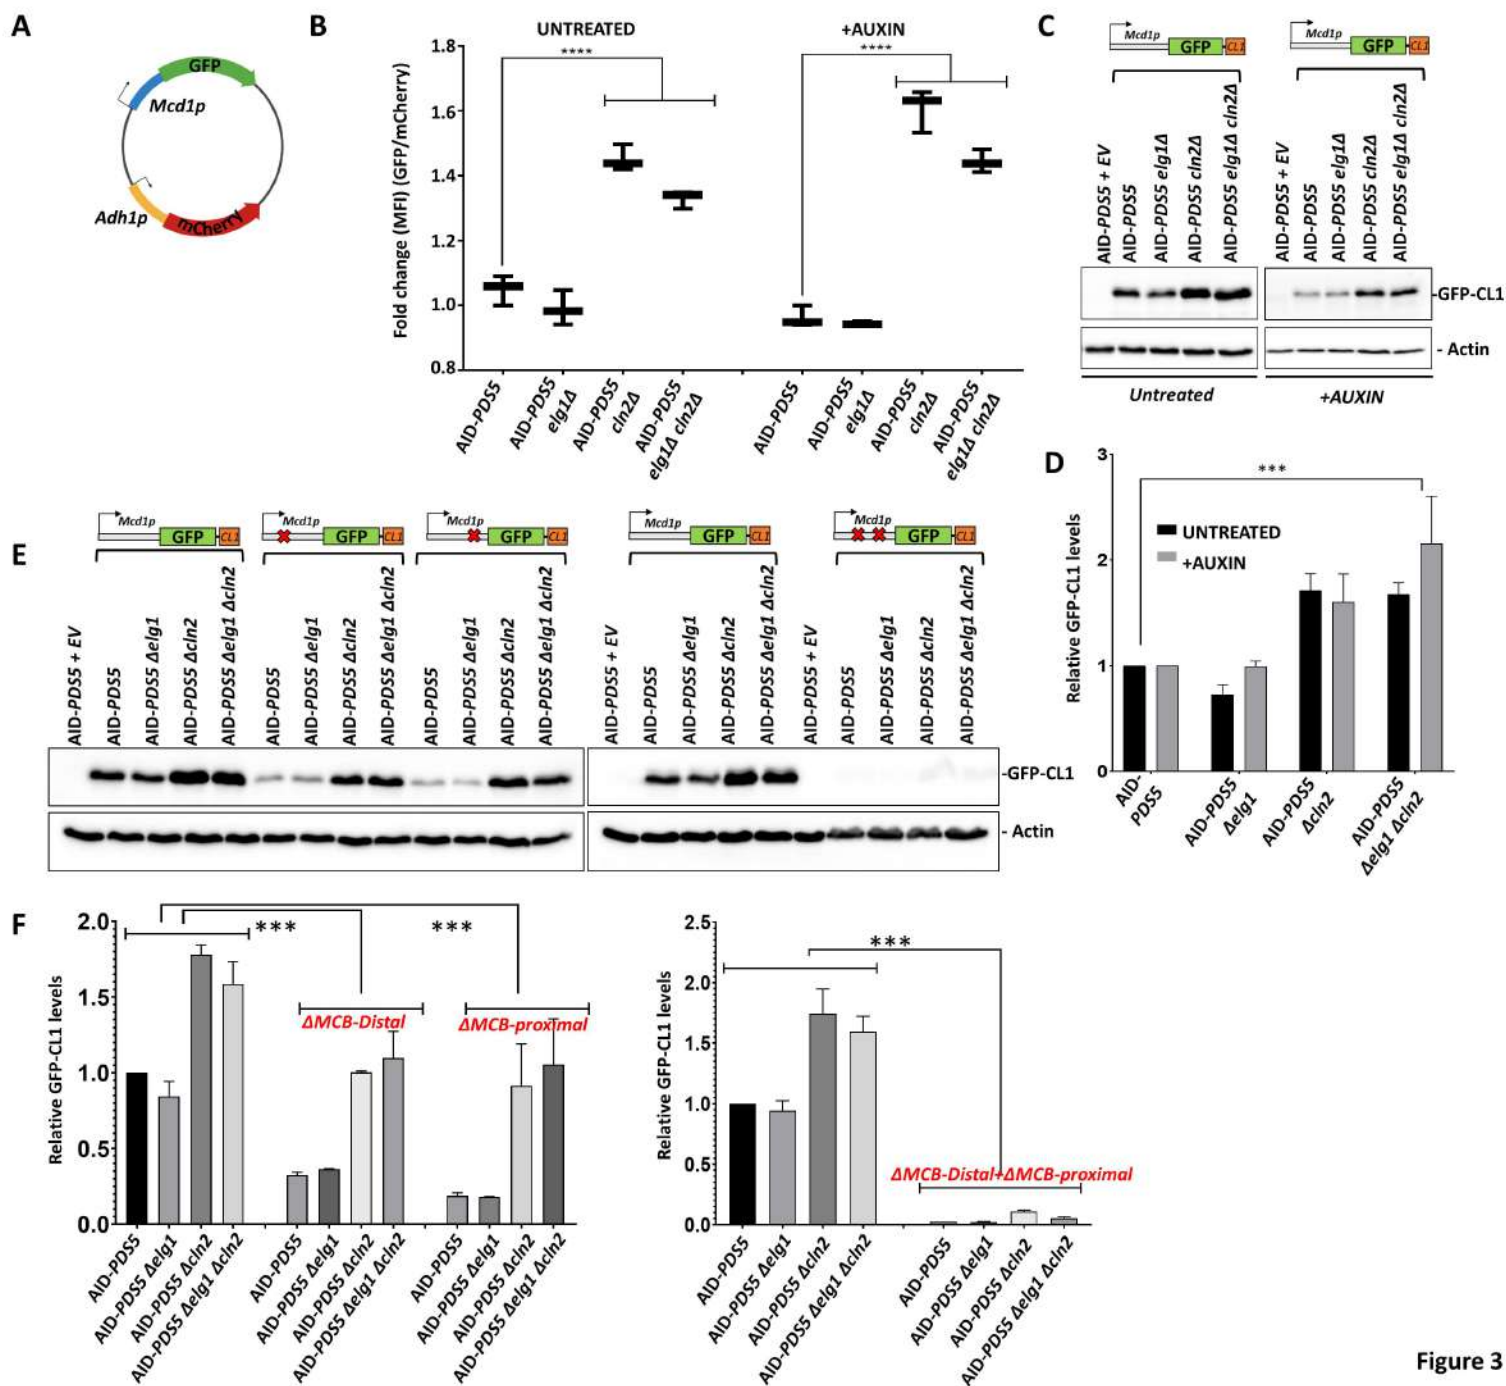

Figure 3

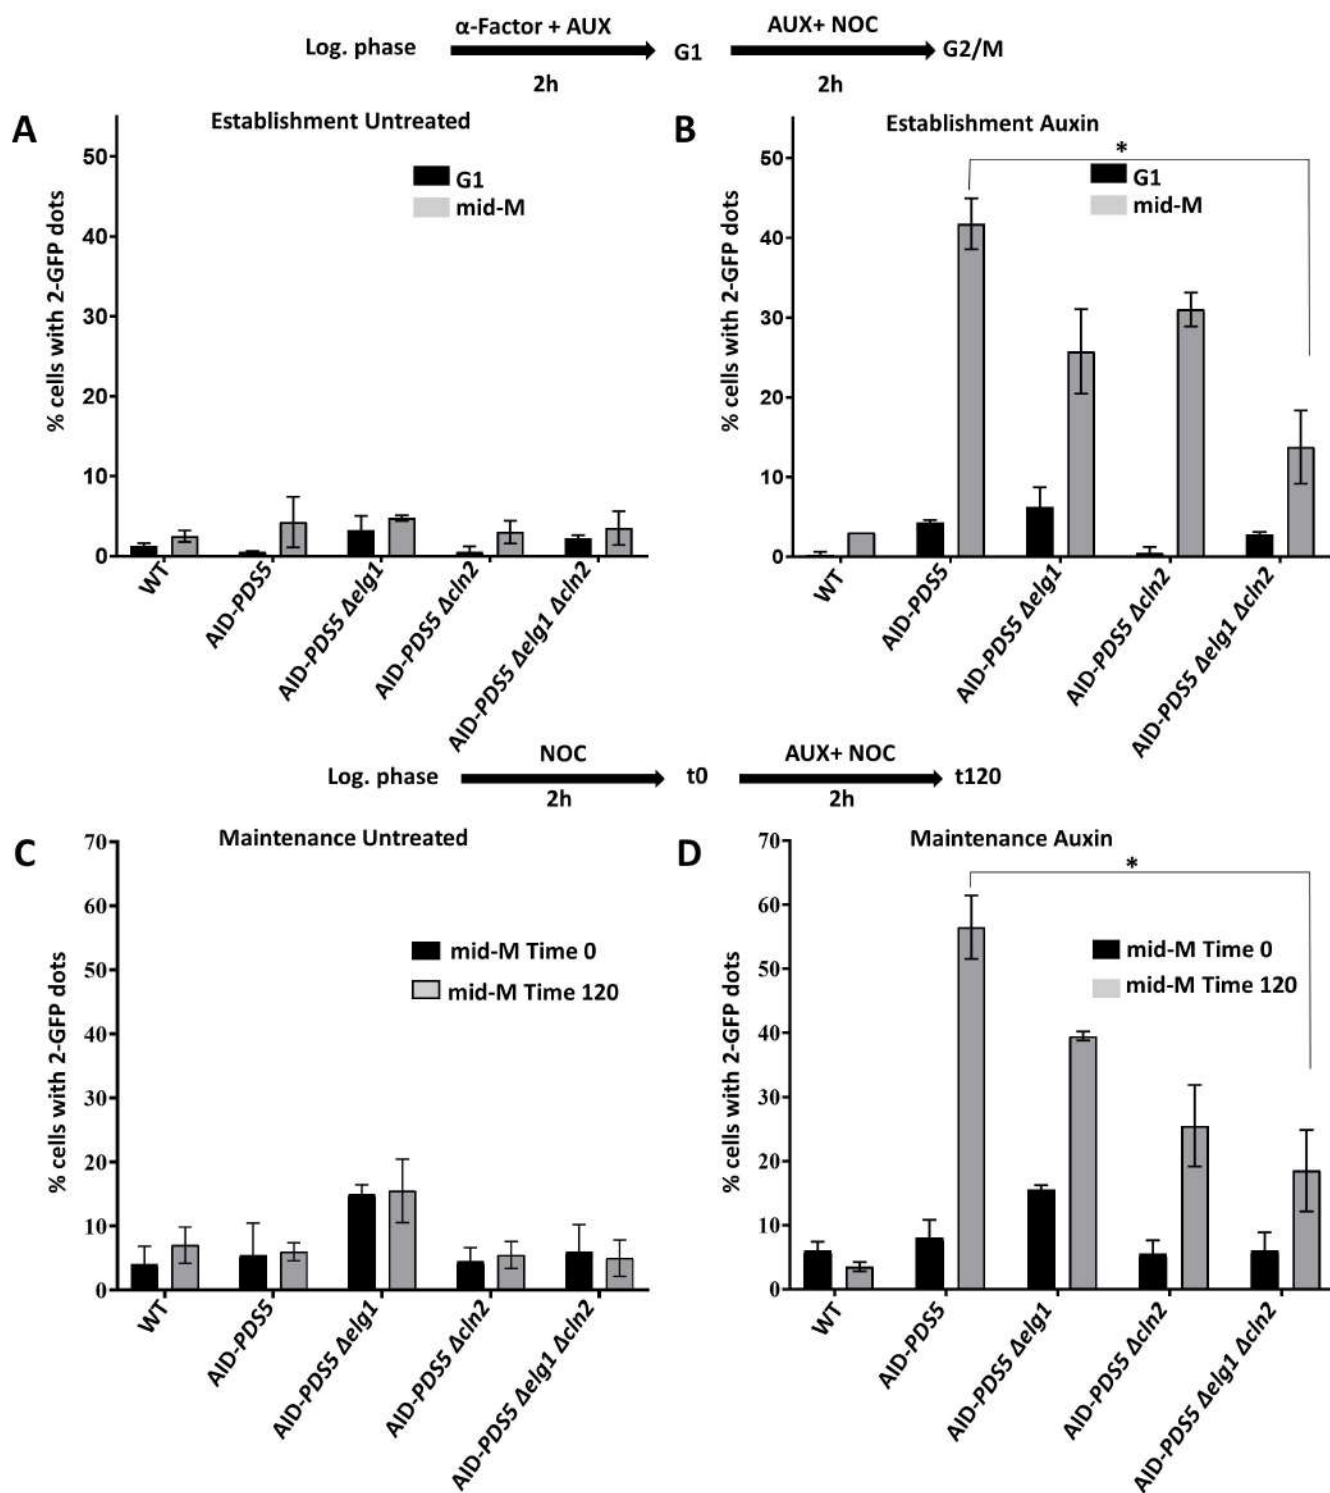

Figure 4

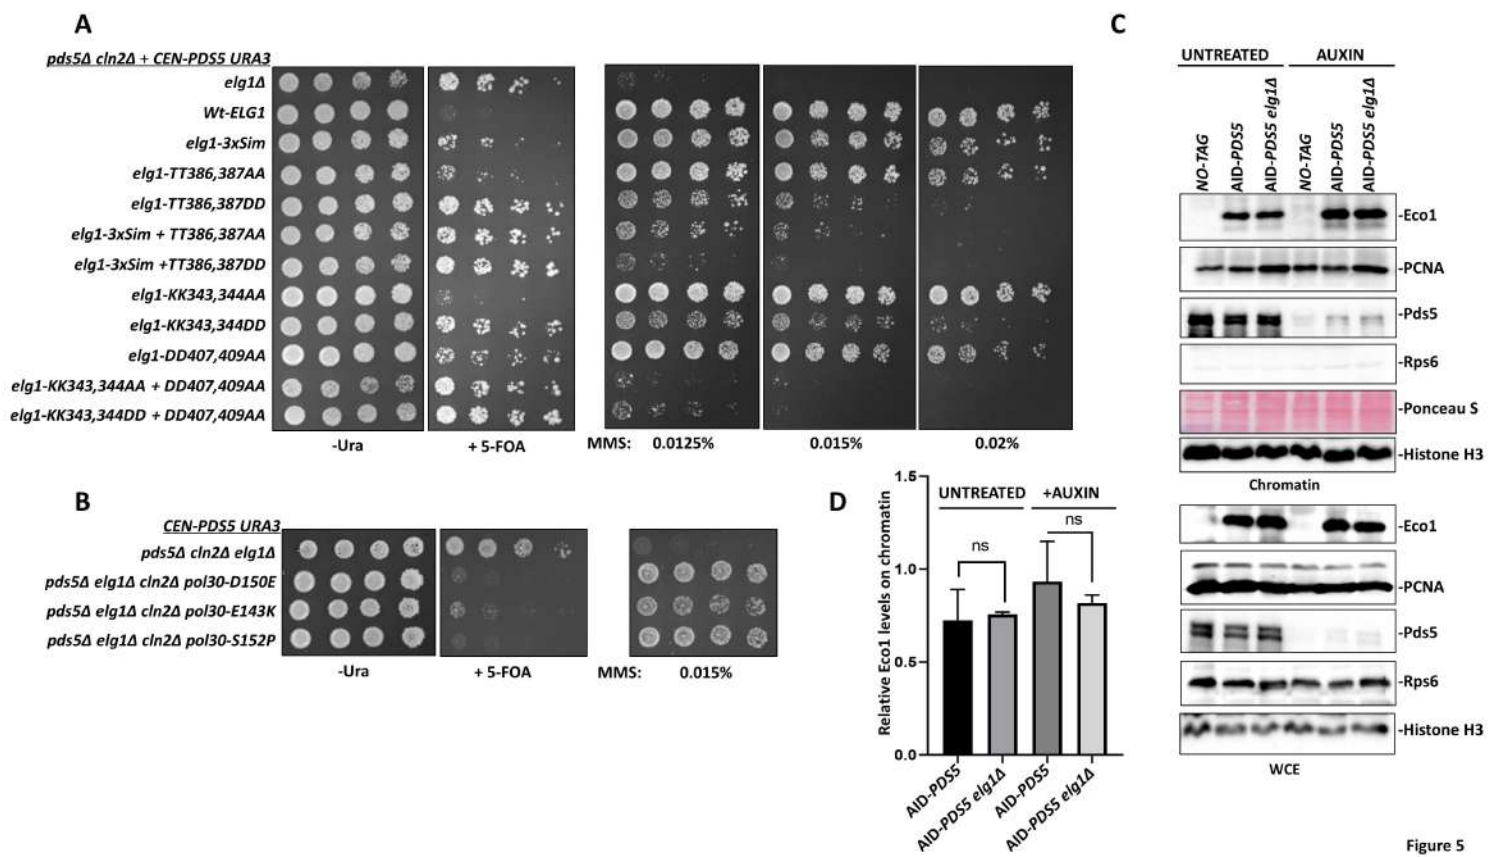

Figure 5

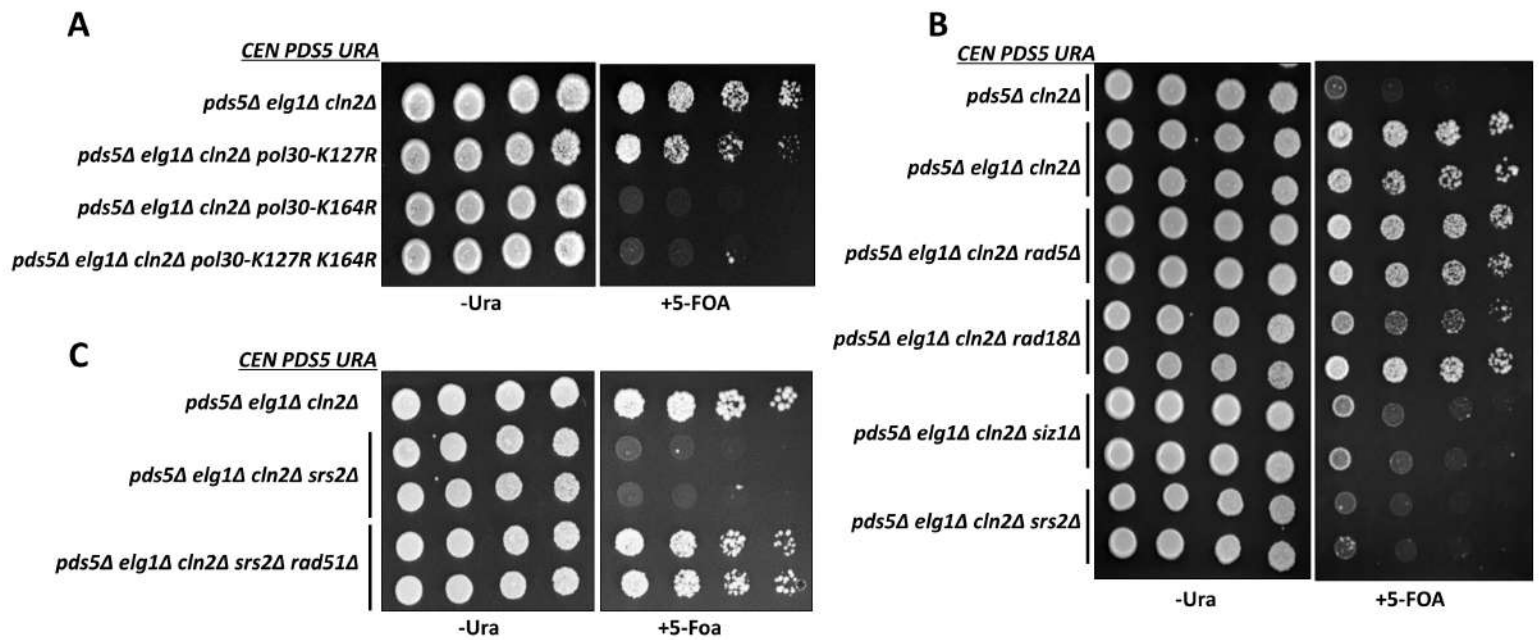

Figure 6

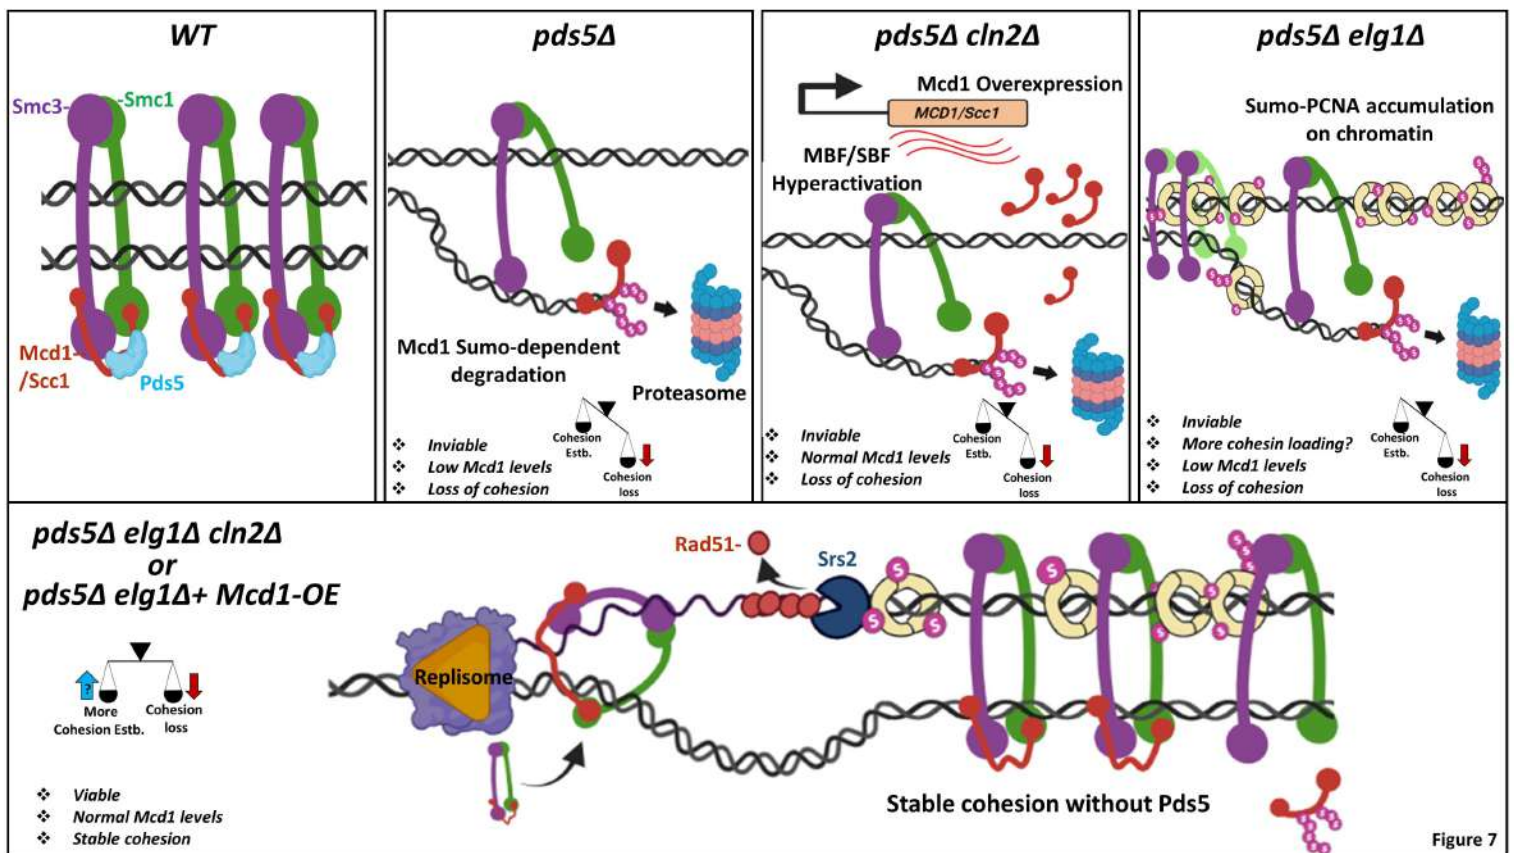

Figure 7

| YEAST-Strain number | Genotype                                                                                                                                                                              |
|---------------------|---------------------------------------------------------------------------------------------------------------------------------------------------------------------------------------|
| <b>MKDK23</b>       | <i>Mat A pds5Δ::Hygmx lacO (DK)-NAT; 10kbCEN4 pHIS3-GFPLacI-HIS3:his3-11,15 GAL1+ trp1-1 leu2-3,112 ura3-52 bar1 + pGV282 [CEN3 URA3 PDS5]</i>                                        |
| <b>MKDK113</b>      | <i>Mat A pds5Δ::Hygmx elg1Δ :: KanMX lacO (DK)-NAT; 10kbCEN4 pHIS3-GFPLacI-HIS3:his3-11,15 GAL1+ trp1-1 leu2-3,112 ura3-52 bar1 + pGV282 [CEN3 URA3 PDS5]</i>                         |
| <b>MKDK470</b>      | <i>Mat A pds5Δ::Hygmx cln2Δ :: cgTRP1 lacO (DK)-NAT; 10kbCEN4 pHIS3-GFPLacI-HIS3:his3-11,15 GAL1+ trp1-1 leu2-3,112 ura3-52 bar1 + pGV282 [CEN3 URA3 PDS5]</i>                        |
| <b>MKDK471</b>      | <i>Mat A pds5Δ::Hygmx elg1Δ :: KanMX cln2Δ :: cgTRP1 lacO (DK)-NAT; 10kbCEN4 pHIS3-GFPLacI-HIS3:his3-11,15 GAL1+ trp1-1 leu2-3,112 ura3-52 bar1 + pGV282 [CEN3 URA3 PDS5]</i>         |
| <b>MKDK474</b>      | <i>Mat A pds5Δ::Hygmx cln1Δ :: cgTRP1 lacO (DK)-NAT; 10kbCEN4 pHIS3-GFPLacI-HIS3:his3-11,15 GAL1+ trp1-1 leu2-3,112 ura3-52 bar1 + pGV282 [CEN3 URA3 PDS5]</i>                        |
| <b>MKDK477</b>      | <i>Mat A pds5Δ::Hygmx elg1Δ :: KanMX cln1Δ :: CgTRP1 lacO (DK)-NAT; 10kbCEN4 pHIS3-GFPLacI-HIS3:his3-11,15 GAL1+ trp1-1 leu2-3,112 ura3-52 bar1 + pGV282 [CEN3 URA3 PDS5]</i>         |
| <b>MKDK38</b>       | <i>Mat A LacO-NAT::lys4 trp1-1 bar1 GFPLacI-HIS3::his3-11,15 leu2-3,112 ura3-52 GAL+</i>                                                                                              |
| <b>MKDK475</b>      | <i>Mat A PDS5-3v5-AID2::KanMX6 ADH1-TIR1-URA3::ura3-52 LacO(DK)-NAT::lys4 pHIS3-GFP-LacI-HIS3::his3-11,15 trp1-1 leu2-3,112 bar1 GAL+</i>                                             |
| <b>E-B1-62</b>      | <i>Mat A PDS5-3v5-AID2::KanMX6 elg1Δ::HygMX ADH1-TIR1-URA3::ura3-52 LacO(DK)-NAT::lys4 pHIS3-GFP-LacI-HIS3::his3-11,15 trp1-1 leu2-3,112 bar1 GAL+</i>                                |
| <b>E-B1-64</b>      | <i>Mat A PDS5-3v5-AID2::KanMX6 cln2Δ::cgTRP1 ADH1-TIR1-URA3::ura3-52 LacO(DK)-NAT::lys4 pHIS3-GFP-LacI-HIS3::his3-11,15 trp1-1 leu2-3,112 bar1 GAL+</i>                               |
| <b>E-B1-73</b>      | <i>Mat A PDS5-3v5-AID2::KanMX6 elg1Δ::HygMX cln2Δ::cgTRP1 ADH1-TIR1-URA3::ura3-52 LacO(DK)-NAT::lys4 pHIS3-GFP-LacI-HIS3::his3-11,15 trp1-1 leu2-3,112 bar1 GAL+</i>                  |
| <b>SC_190</b>       | <i>Mat A Pds5-3v5-AID2::KanMX6 ADH1-TIR1-URA3::ura3-52 his3-11,15 trp1-1 leu2-3,112 lys2-801, bar1 GAL+</i>                                                                           |
| <b>SC_193</b>       | <i>Mat A Pds5-3v5-AID2::KanMX elg1Δ::HygMX ADH1-TIR1-URA3::ura3-52 his3-11,15 trp1-1 leu2-3,112 lys2-801, bar1 GAL+</i>                                                               |
| <b>SC_196</b>       | <i>Mat A Pds5-3v5-AID2::KanMX cln2Δ::cgTRP1 ADH1-TIR1-URA3::ura3-52 his3-11,15 trp1-1 leu2-3,112 lys2-801, bar1 GAL+</i>                                                              |
| <b>SC_199</b>       | <i>Mat A Pds5-3v5-AID2::KanMX elg1Δ::HygMX cln2Δ::cgTRP1 ADH1-TIR1-URA3::ura3-52 his3-11,15 trp1-1 leu2-3,112 lys2-801, bar1 GAL+</i>                                                 |
| <b>SC_267</b>       | <i>Mat A Elg1(WT)-13myc::KanMX pds5Δ::Hygmx cln2Δ :: cgTRP1 lacO (DK)-NAT; 10kbCEN4 pHIS3-GFPLacI-HIS3:his3-11,15 GAL1+ trp1-1 leu2-3,112 ura3-52 bar1 +CEN PDS5 URA</i>              |
| <b>SC_268</b>       | <i>Mat A 3XSIM-ELG1 -13myc ::KanMX pds5Δ::Hygmx cln2Δ :: cgTRP1 lacO (DK)-NAT; 10kbCEN4 pHIS3-GFPLacI-HIS3:his3-11,15 GAL1+ trp1-1 leu2-3,112 ura3-52 bar1 +CEN PDS5 URA</i>          |
| <b>SC_269</b>       | <i>Mat A elg1-386/7AA-13MYC::KanMX pds5Δ::Hygmx cln2Δ :: cgTRP1 lacO (DK)-NAT; 10kbCEN4 pHIS3-GFPLacI-HIS3:his3-11,15 GAL1+ trp1-1 leu2-3,112 ura3-52 bar1 +CEN PDS5 URA</i>          |
| <b>SC_270</b>       | <i>Mat A elg1-386/7DD-13MYC::KanMX pds5Δ::Hygmx cln2Δ :: cgTRP1 lacO (DK)-NAT; 10kbCEN4 pHIS3-GFPLacI-HIS3:his3-11,15 GAL1+ trp1-1 leu2-3,112 ura3-52 bar1 +CEN PDS5 URA</i>          |
| <b>SC_271</b>       | <i>Mat A 3X-SIM + elg1-386/7DD-13MYC::KanMX pds5Δ::Hygmx cln2Δ :: cgTRP1 lacO (DK)-NAT; 10kbCEN4 pHIS3-GFPLacI-HIS3:his3-11,15 GAL1+ trp1-1 leu2-3,112 ura3-52 bar1 +CEN PDS5 URA</i> |
| <b>SC_272</b>       | <i>Mat A elg1-KK343/4AA-13myc::KanMX pds5Δ::Hygmx cln2Δ :: cgTRP1 lacO (DK)-NAT; 10kbCEN4 pHIS3-GFPLacI-HIS3:his3-11,15 GAL1+ trp1-1 leu2-3,112 ura3-52 bar1 +CEN PDS5 URA</i>        |
| <b>SC_273</b>       | <i>Mat A elg1-KK343/4DD-13myc::KanMX pds5Δ::Hygmx cln2Δ :: cgTRP1 lacO (DK)-NAT; 10kbCEN4 pHIS3-GFPLacI-HIS3:his3-11,15 GAL1+ trp1-1 leu2-3,112 ura3-52 bar1 +CEN PDS5 URA</i>        |
| <b>SC_274</b>       | <i>Mat A elg1-DD407,409AA-13myc::KanMX pds5Δ::Hygmx cln2Δ :: cgTRP1 lacO (DK)-NAT; 10kbCEN4 pHIS3-GFPLacI-HIS3:his3-11,15 GAL1+ trp1-1 leu2-3,112 ura3-52 bar1 +CEN PDS5 URA</i>      |

| Strain number | Genotype                                                                                                                                                                                                 |
|---------------|----------------------------------------------------------------------------------------------------------------------------------------------------------------------------------------------------------|
| <b>SC_275</b> | <i>Mat A elg1-DD407,409AA + KK343/344AA -13myc::KanMX pds5Δ::Hygmx cln2Δ :: cgTRP1 lacO (DK)-NAT; 10kbCEN4 pHIS3-GFPLacI-HIS3:his3-11,15 GAL1+ trp1-1 leu2-3,112 ura3-52 bar1 +CEN PDS5 URA</i>          |
| <b>SC_276</b> | <i>Mat A elg1-DD407,409AA+ KK343/344DD-13myc::KanMX pds5Δ::Hygmx cln2Δ :: cgTRP1 lacO (DK)-NAT; 10kbCEN4 pHIS3-GFPLacI-HIS3:his3-11,15 GAL1+ trp1-1 leu2-3,112 ura3-52 bar1 +CEN PDS5 URA</i>            |
| <b>SC_277</b> | <i>Mat A 3X-SIM + elg1-386/7AA-13MYC::KanMX pds5Δ::Hygmx cln2Δ :: cgTRP1 lacO (DK)-NAT; 10kbCEN4 pHIS3-GFPLacI-HIS3:his3-11,15 GAL1+ trp1-1 leu2-3,112 ura3-52 bar1 +CEN PDS5 URA</i>                    |
| <b>SC_99</b>  | <i>Mat A pds5Δ::Hygmx leu2::pol30-D150E elg1Δ :: KanMX cln2Δ :: cgTRP1 lacO (DK)-NAT; 10kbCEN4 pHIS3-GFPLacI-HIS3:his3-11,15 GAL1+ trp1-1 leu2-3,112 ura3-52 bar1 + pGV282 [CEN3 URA3 PDS5]</i>          |
| <b>SC_100</b> | <i>Mat A pds5Δ::Hygmx leu2::pol30-E143K elg1Δ :: KanMX cln2Δ :: cgTRP1 lacO (DK)-NAT; 10kbCEN4 pHIS3-GFPLacI-HIS3:his3-11,15 GAL1+ trp1-1 leu2-3,112 ura3-52 bar1 + pGV282 [CEN3 URA3 PDS5]</i>          |
| <b>SC_93</b>  | <i>Mat A pds5Δ::Hygmx leu2::pol30-S152P elg1Δ :: KanMX cln2Δ :: cgTRP1 lacO (DK)-NAT; 10kbCEN4 pHIS3-GFPLacI-HIS3:his3-11,15 GAL1+ trp1-1 leu2-3,112 ura3-52 bar1 + pGV282 [CEN3 URA3 PDS5]</i>          |
| <b>SC_310</b> | <i>Mat A Eco1-3HA::Hismx6 Pds5-3v5-AID2::KanMX ADH1-TIR1-URA3::ura3-52 his3-11,15 trp1-1 leu2-3,112 lys2-801, bar1 GAL+</i>                                                                              |
| <b>SC_311</b> | <i>Mat A Eco1-3HA::Hismx6 elg1 Δ::HygMX Pds5-3v5-AID2::KanMX ADH1-TIR1-URA3::ura3-52 his3-11,15 trp1-1 leu2-3,112 lys2-801, bar1 GAL+</i>                                                                |
| <b>SC_73</b>  | <i>Mat A pds5Δ::Hygmx leu2::pol30 K127R elg1Δ :: KanMX cln2Δ :: cgTRP1 lacO (DK)-NAT; 10kbCEN4 pHIS3-GFPLacI-HIS3:his3-11,15 GAL1+ trp1-1 leu2-3,112 ura3-52 bar1 + pGV282 [CEN3 URA3 PDS5]</i>          |
| <b>SC_74</b>  | <i>Mat A pds5Δ::Hygmx leu2::pol30 K127R,K164R elg1Δ :: KanMX cln2Δ :: cgTRP1 lacO (DK)-NAT; 10kbCEN4 pHIS3-GFPLacI-HIS3:his3-11,15 GAL1+ trp1-1 leu2-3,112 ura3-52 bar1 + pGV282 [CEN3 URA3 PDS5]</i>    |
| <b>SC_75</b>  | <i>Mat A pds5Δ::Hygmx leu2::pol30 K164R elg1Δ :: KanMX cln2Δ :: cgTRP1 lacO (DK)-NAT; 10kbCEN4 pHIS3-GFPLacI-HIS3:his3-11,15 GAL1+ trp1-1 leu2-3,112 ura3-52 bar1 + pGV282 [CEN3 URA3 PDS5]</i>          |
| <b>SC_108</b> | <i>Mat A rad5Δ::KanMX elg1Δ::LEU2-MX pds5Δ::Hygmx cln2Δ :: cgTRP1 lacO (DK)-NAT; 10kbCEN4 pHIS3-GFPLacI-HIS3:his3-11,15 GAL1+ trp1-1 leu2-3,112 ura3-52 bar1 + pGV282 [CEN3 URA3 PDS5]</i>               |
| <b>SC_159</b> | <i>Mat A rad18Δ::KanMX elg1Δ :: HisGMX pds5Δ::Hygmx cln2Δ :: cgTRP1 lacO (DK)-NAT; 10kbCEN4 pHIS3-GFPLacI-HIS3:his3-11,15 GAL1+ trp1-1 leu2-3,112 ura3-52 bar1+ pGV282 [CEN3 URA3 PDS5]</i>              |
| <b>SC_110</b> | <i>Mat A siz1Δ::KanMX elg1Δ::LEU2-MX pds5Δ::Hygmx cln2Δ :: cgTRP1 lacO (DK)-NAT; 10kbCEN4 pHIS3-GFPLacI-HIS3:his3-11,15 GAL1+ trp1-1 leu2-3,112 ura3-52 bar1 + pGV282 [CEN3 URA3 PDS5]</i>               |
| <b>SC_111</b> | <i>Mat A srs2Δ::KanMX elg1Δ::LEU2-MX pds5Δ::Hygmx cln2Δ:: cgTRP1 lacO (DK)-NAT; 10kbCEN4 pHIS3-GFPLacI-HIS3:his3-11,15 GAL1+ trp1-1 leu2-3,112 ura3-52 bar1 + pGV282 [CEN3 URA3 PDS5]</i>                |
| <b>SC_266</b> | <i>Mat A rad51Δ::Leu2 srs2Δ::KanMX elg1Δ :: HisGMX pds5Δ::Hygmx cln2Δ :: cgTRP1 lacO (DK)-NAT; 10kbCEN4 pHIS3-GFPLacI-HIS3:his3-11,15 GAL1+ trp1-1 leu2-3,112 ura3-52 bar1 + pGV282 [CEN3 URA3 PDS5]</i> |
| <b>SX48B</b>  | <i>Mat A trp1-1::TIR1-cgTRP1 LacO-NAT::lys4 GFPLacI-HIS3:his3-11,15 SMC3-A1089-V5-BirA SMC3-P533-Avi6HA-LEU2:leu2-3,112 ura3-52 bar1 GAL+</i>                                                            |
| <b>SX122B</b> | <i>Mat A trp1-1::TIR1-cgTRP1 LacO-NAT::lys4 GFPLacI-HIS3:his3-11,15 SMC3-A1089-V5-BirA SMC3-P533-Avi6HA-LEU2:leu2-3,112 PDS5-3V5-AID2:G418 ura3-52 bar1 GAL+</i>                                         |
| <b>SX283</b>  | <i>Mat A trp1-1::TIR1-cgTRP1 LacO-NAT::lys4 GFPLacI-HIS3:his3-11,15 SMC3-A1089-V5-BirA SMC3-P533-Avi6HA-LEU2:leu2-3,112 cln2Δ::cgTRP1 elg1Δ::HygMX ura3-52 bar1 GAL+</i>                                 |
|               |                                                                                                                                                                                                          |
|               |                                                                                                                                                                                                          |

| Strain number | Genotype                                                                                                                                                                                    |
|---------------|---------------------------------------------------------------------------------------------------------------------------------------------------------------------------------------------|
| <b>SX284</b>  | <i>Mat A trp1-1::TIR1-cgTRP1 LacO-NAT::lys4 GFPLacI-HIS3:his3-11,15 SMC3-A1089-V5-BirA SMC3-P533-Avi6HA-LEU2:leu2-3,112 cln2Δ::cgTRP1 elg1Δ::HygMX PDS5-3V5-AID2:G418 ura3-52 bar1 GAL+</i> |
| <b>SX297</b>  | <i>Mat A trp1-1::TIR1-cgTRP1 LacO-NAT::lys4 GFPLacI-HIS3:his3-11,15 SMC3-A1089-V5-BirA SMC3-P533-Avi6HA-LEU2:leu2-3,112 elg1Δ::HygMX PDS5-3V5-AID2:G418 ura3-52 bar1 GAL+</i>               |
| <b>SX298</b>  | <i>Mat A trp1-1::TIR1-cgTRP1 LacO-NAT::lys4 GFPLacI-HIS3:his3-11,15 SMC3-A1089-V5-BirA SMC3-P533-Avi6HA-LEU2:leu2-3,112 cln2Δ::cgTRP1 PDS5-3V5-AID2:G418 ura3-52 bar1 GAL+</i>              |
|               |                                                                                                                                                                                             |
|               |                                                                                                                                                                                             |
|               |                                                                                                                                                                                             |

#### PLASMIDS:

| Plasmid number | Insert information                                                                               |
|----------------|--------------------------------------------------------------------------------------------------|
| <b>pGV282</b>  | <i>CEN3 URA3 pPds5-PDS5</i>                                                                      |
| <b>MKDK400</b> | <i>YEp181-2μ-LEU2 pMcd1-MCD1 (WT)</i>                                                            |
| <b>MKDK402</b> | <i>YEp181-2μ-LEU2 pMcd1-mcd1-KK84,210QQ</i>                                                      |
| <b>MKDK404</b> | <i>YEp181-2μ-LEU2 pMcd1- mcd1-KK84,210RR</i>                                                     |
| <b>MKDK327</b> | <i>YEp181-2μ-LEU2 pMcd1- mcd1-F528R</i>                                                          |
| <b>MKDK329</b> | <i>YEp181-2μ-LEU2 pMcd1-mcd1-L532R</i>                                                           |
| <b>MKDK335</b> | <i>YEp181-2μ-LEU2 pMcd1-mcd1-V137K</i>                                                           |
| <b>K133</b>    | <i>pRS425-2μ-LEU2 pADH1-mCherry pMcd1-yEGFP-CL1 (degron)</i>                                     |
| <b>K177</b>    | <i>pRS425-2μ-LEU2 pADH1-mCherry pMcd1 Δ(-372 to -366) -yEGFP-CL1 (degron) [ΔMCB-DISTAL]</i>      |
| <b>K179</b>    | <i>pRS425-2μ-LEU2 pADH1-mCherry pMcd1 Δ(-292 &amp; -286) -yEGFP-CL1 (degron) [ΔMCB-PROXIMAL]</i> |
